# Supplementary material for: Porous organic polycarbene nanotrap for efficient and selective gold stripping from electronic waste
Source: Springer Nature journal article supplement (doi:10.1038/s41467-023-35971-w), 2023-01-17
Supplement: MOESM1 [file 41467_2023_35971_MOESM1_ESM.pdf]

# Supplementary Information

## **Porous Organic Polycarbene Nanotrap for Efficient and Selective Gold Stripping from Electronic Waste**

Xinghao Li<sup>1</sup>, Yong-Lei Wang<sup>2</sup>, Jin Wen<sup>1</sup>, Linlin Zheng<sup>1</sup>, Cheng Qian<sup>1</sup>,  
Zhonghua Cheng<sup>1</sup>, Hongyu Zuo<sup>1</sup>, Mingqing Yu<sup>1</sup>, Jiayin Yuan<sup>2</sup>, Rong Li<sup>3</sup>,  
Weiyi Zhang<sup>1\*</sup> & Yaozu Liao<sup>1\*</sup>

<sup>1</sup>State Key Laboratory for Modification of Chemical Fibers and Polymer Materials, College of Materials Science and Engineering, Donghua University, Shanghai 201620, China

<sup>2</sup>Department of Materials and Environmental Chemistry, Stockholm University, Stockholm 10691, Sweden

<sup>3</sup>College of Chemistry and Chemical Engineering, Donghua University, Shanghai 201620, China

\*Corresponding authors: Weiyi Zhang ([wyzhang@dhu.edu.cn](mailto:wyzhang@dhu.edu.cn))

Yaozu Liao ([yzliao@dhu.edu.cn](mailto:yzliao@dhu.edu.cn))

## Supplementary Methods

### 1. Characterization methods

The liquid proton nuclear magnetic resonance ( $^1\text{H}$  NMR) measurements and  $^{13}\text{C}$  nuclear magnetic resonance ( $^{13}\text{C}$  NMR) measurements were taken at a Bruker Advance 600 (600 MHz) spectrometer. The solid-state  $^{13}\text{C}$  nuclear magnetic resonance ( $^{13}\text{C}$  NMR) measurements were taken at a Bruker Advance 400 (400 MHz) spectrometer. Fourier-transform infrared spectroscopy (FT-IR) spectra were collected using a Thermo Scientific Nicolet iS5 spectrometer. The scanning electron microscope (SEM) images were obtained on a Hitachi SU8010 microscope. The transmission electron microscope (TEM) images were obtained on a Talos F200S microscope. Aberration-correction high-angle annular dark field scanning transmission electron microscopy (AC-HAADF-STEM) images and the energy dispersive spectroscopy (EDS) were recorded on a FEI Tecnai Osiris and Titan3. The specific surface areas of the samples were determined according to the Brunauer-Emmett-Teller (BET) model and the pore size distribution was calculated by the Non-Local Density Functional Theory (NLDFT) method. All relative data were obtained on a Micro ASAP 2046 surface area and porosity analyzer. X-ray photoelectron spectroscopy (XPS) was conducted at a Thermo Fisher Scientific Escalab 250Xi under high vacuum ( $1 \times 10^{-9}$  Torr), and all binding energy were calibrated to the C1s peak at 284.8 eV. The crystallinity of the samples that after adsorbed metal ions was characterization by an Arigaku D Max 2550 VB PC X-ray diffraction spectrometer (18 KW, Cu K $\alpha$  radiation with  $\lambda=1.548 \text{ \AA}$ ). The concentration of  $\text{Au}^{3+}$  and other metal elements was measured on NexION 350D inductively coupled plasma mass spectrometer (ICP-OES PerkinElmer). The number average molecular weight ( $M_n$ ) and polydispersity (PDI) of samples were measured on Breeze gas gel

chromatograph (Waters, USA). The water contact angle of materials were measured by OCA25 video optical contact angle meter (Dataphysics, Germany).

## **2. Gold adsorption and recovery study**

### **2.1 Adsorption isothermal experiments**

The Langmuir adsorption isotherm model and the Freundlich adsorption isotherm model was applied to study the adsorption behavior of metal ions on adsorbent. As an empirical model, Freundlich adsorption model is based on the assumption that adsorption sites with strong adsorption capacity preferentially complete the adsorption process, resulting in the formation of multilayers on heterogeneous surfaces and the interaction between adsorbed ions. The adsorption isotherm model can be described mathematically as Equation (1).

$$Q_e = k_F C_e^{1/n} \quad (1)$$

Where  $C_e$  is the equilibrium concentration (mg/L),  $Q_e$  is the equilibrium adsorption capacity (mg/g),  $n$  is the Freundlich exponent,  $k_F$  (mg/g) is the Freundlich adsorption isotherm constant.

The Langmuir adsorption model assumes that all adsorption sites in the adsorbent are equivalent, which forms a homogeneous surface with the same force on the surface of the adsorbent. The adsorption isotherm model can be described mathematically as Equation (2).

$$\frac{C_e}{Q_e} = \frac{1}{Q_{\max} \times k_L} + \frac{C_e}{Q_{\max}} \quad (2)$$

Where  $C_e$  is the equilibrium concentration (mg g<sup>-1</sup>),  $Q_e$  is the equilibrium adsorption capacity (mg g<sup>-1</sup>),  $Q_{\max}$  is the maximum adsorption amount at the time of equilibrium (mg g<sup>-1</sup>),  $k_L$  (L mg<sup>-1</sup>) is the Langmuir adsorption isotherm constant.

To obtain adsorption isotherms, 5 mg of P<sub>triaz</sub>-CN-A was placed in 10 mL aqueous solutions of varying Au<sup>3+</sup>/Pt<sup>2+</sup> concentrations (100-5000 ppm). The solutions were then stirred for 24 h at 600 rpm to achieve adsorption equilibrium. The solutions were filtered through a 0.45 µm syringe filter units and the filter was analyzed *via* ICP-OES to determine the residual metal ion concentrations. The amount adsorbed or uptake capacity, Q<sub>e</sub> (mg g<sup>-1</sup>), at equilibrium was calculated using Equation (3).

$$Q_e = \frac{(C_0 - C_e) \times V}{m} \quad (3)$$

Where C<sub>0</sub> (mg L<sup>-1</sup>) and C<sub>e</sub> (mg L<sup>-1</sup>) are the original concentration and adsorption equilibrium concentration, respectively. V is the volume of solution (L), m is the mass of adsorbent (g).

## 2.2 pH effect on gold adsorption

100 ppm Au<sup>3+</sup> solution was adjusted by KOH (1 M) and HCl (1 M) to pH values of 2, 4, 7, 9. At each pH, six experiments samples were prepared. Each sample was added 10 mL of the solution and 5 mg of P<sub>triaz</sub>-CN-A was added to each experiment sample. The tubes were then shaken at 300 rpm for 30 min, 1 h, 3 h, 6 h, 12 h, and 24 h. The adsorbent was then filtered by 0.45 µm syringe filter units and the remaining Au<sup>3+</sup> concentrations in solution were determined by ICP-OES.

## 2.3 Desorption and recyclability

100 ppm Au<sup>3+</sup> solution was used for adsorption steps. The adsorption experiments were performed as described in the Au<sup>3+</sup> adsorption isotherm experiment above. After one run of adsorption, the P<sub>triaz</sub>-CN-A (Au) was regenerated by treatment with the elution solution and reused for another adsorption experiment. In a typical desorption experiment, the P<sub>triaz</sub>-CN-A (Au) was first rinsed with DI water, and then desorbed with 20 mL elution solution containing a 1:1 (v/v) solution of thiourea (1 M) and HCl (1 M) under stirring for at 60 °C for 8 h. The filtrate was separated from

the adsorbent by filtration and the concentration was determined by ICP-OES. The elution efficiency was determined by using Equation (4)

$$\text{Elution Efficiency} = \frac{C_e \times V_e}{(C_o - C_t) \times V_a} \times 100 \% \quad (4)$$

Where  $C_e$  (mg L<sup>-1</sup>) is the Au<sup>3+</sup> concentration in the elution solution,  $V_e$  (L) is the volume of elution solution,  $C_t$  (mg L<sup>-1</sup>) is the Au<sup>3+</sup> concentration in water after Au<sup>3+</sup> adsorption,  $C_o$  (mg L<sup>-1</sup>) is the original Au<sup>3+</sup> concentration in water,  $V_a$  (L) is the volume of Au<sup>3+</sup> contained water for adsorption.

## 2.4 Selectivity in multi-element solutions

5 mg of Ptriz-CN-A was added to tube containing 10 mL of a mixed metal solution containing 5 ppm Au<sup>3+</sup>, Pt<sup>2+</sup>, and 300 ppm Cu<sup>2+</sup>, Mg<sup>2+</sup>, Ni<sup>2+</sup>, Cr<sup>2+</sup>, Co<sup>2+</sup>, and Zn<sup>2+</sup>. The solutions were stirred overnight to achieve equilibrium. And then filtered through a 0.45 µm membrane filter, the filtrate was analyzed *via* ICP-OES to determine the residual metal ion concentrations. Comparison of the selectivity adsorption experiments were performed using the following Equation (5) and Equation (6)

$$\text{Recovery Efficiency} = \frac{C_o - C_t}{C_o} \times 100 \% \quad (5)$$

Where  $C_o$  (mg L<sup>-1</sup>) and  $C_t$  (mg L<sup>-1</sup>) are the original concentration and the concentration at a given time of metal ions.

$$K_d = \frac{(C_o - C_e)}{C_e} \times \frac{V}{m} \quad (6)$$

Where  $K_d$  is the distribution coefficient describing the affinity of the adsorbent toward a certain metal ion;  $C_o$  (mg L<sup>-1</sup>) and  $C_e$  (mg L<sup>-1</sup>) are the original concentration and adsorption equilibrium concentration, and  $V$  is the volume of solution (L),  $m$  is the mass of adsorbent (g); the selectivity coefficient of two metal ions, M1 / M2, is represented by the ratio of  $K_d$  values of the according metal ions.

## 2.5 Gold capture from actual e-waste solution

We choose disused CPU as waste electrical and electronic equipment. The

waste CPU which we used had an array of pins composed of Au, Cu and some other metals. Then, the metal spins were removed from CPU to be processed in leaching solution. The metal leaching solution was prepared by mixing 1  $\mu$ L of pyridine and 750 mg of NBS in 120 mL of DI water. 0.4 g of the metal spins were put into the solution and the mixture was let stand for 4 days. The resulting e-waste solution was then filtrated and acidified by 1 M HCl to pH=2. The metal content and concentration of the solution was determined by ICP-OES. The adsorption experiment with P<sub>triaz</sub>-CN-A was then performed following the procedure described in the metal selectivity test mentioned above.

## 2.6 Extraction of trace amounts of gold from water

The adsorbents' ability to concentrate trace amounts of gold over time was also tested. For this, 5 mg of P<sub>triaz</sub>-CN-A was added to a 50 mL solution containing 100 ppb Au<sup>3+</sup>. The solutions were then stirred for 24 h and 48 h at 600 rpm, respectively. After that, the solutions were filtered through a 0.45  $\mu$ m syringe filter units and the filter was analyzed *via* ICP-OES to determine the residual Au<sup>3+</sup> concentrations.

## 3. Theoretical calculations

We have employed the Gaussian 09 Revision D.01<sup>1</sup> and Multiwfn (version 3.8)<sup>2, 3</sup> to perform all density functional theory (DFT) calculations at TPSSH/def2-SVP and TPSSH/def2-TZVP levels to elucidate the adsorption-reduction mechanism of P<sub>triaz</sub>-CN-A<sup>4, 5</sup>.

### 3.1 Energy calculations

A single ammonia crosslinking P<sub>triaz</sub>-CN-A unit was used as the model structure to calculate the adsorption and binding energies of metal ions on P<sub>triaz</sub>-CN-A on the basis of Equation (7)

$$E_{\text{bind/ads}} = E_{\text{configuration}} - E_{\text{P}_{\text{triaz}}\text{-CN-A}} - E_{\text{Metal}} \quad (7)$$

Where  $E_{\text{configuration}}$ ,  $E_{\text{Ptriaz-CN-A}}$ , and  $E_{\text{Metal}}$  represent the energy of the Ptriaz-CN-A adsorbed with metal ions, isolated ammonia crosslinking Ptriaz-CN-A model unit and metal ions in the optimized geometries, respectively. It should be noted that  $E_{\text{configuration}}$ ,  $E_{\text{Ptriaz-CN-A}}$ ,  $E_{\text{Metal}}$  should be calculated at the same basis set level, otherwise, BSSE should be took into consideration.

In general, the weak interaction energy between molecules A and B cannot be calculated simply through  $E_{\text{interaction}} = E_{\text{AB}} - E_{\text{A}} - E_{\text{B}}$ , because the decrease of  $E_{\text{AB}}$  energy relative to  $E_{\text{A}} + E_{\text{B}}$  comes from two aspects. On the one hand, it is the real interaction energy between molecules A and B. That's what we want; On the other hand, the basic functions of molecules A and B overlap in the complex system, which is equivalent to increasing the basis group of the complex and reducing the energy of  $E_{\text{AB}}$  (strictly speaking, the premise is that the theoretical method used is based on the variational principle). If this part of contribution is also incorporated into  $E_{\text{interaction}}$ , the interaction energy is overestimated (that is, the binding energy is actually not as negative as calculated), so it should be removed, which is called the Basis Set Superposition Error (BSSE). Therefore, the interaction energy of two molecules should be formulated as  $E_{\text{interaction}} = E_{\text{AB}} - E_{\text{A}} - E_{\text{B}} + E_{\text{BSSE}}$ . For weak interactions, the proportion of  $E_{\text{BSSE}}$  in  $E_{\text{interaction}}$  is often not small, or even exceeds it. If not corrected, the positive and negative signs may not be correct.

For the process of  $\text{Au}^{3+}$  adsorption-reduction on model unit of Ptriaz-CN-A, the energy difference ( $\Delta E$ ) in the adsorption process was defined as  $E_{\text{products}} - E_{\text{reactants}}$ , on the basis of Equation (8) to Equation (11), where  $E$  is the electronic energy.

$$\Delta E_1 = [E_{\text{Ptriaz-CN-A (AuCl}_4^-)} + 2E_{\text{H}_3\text{O}^+}] - [E_{\text{Ptriaz-CN-A}} + E_{\text{AuCl}_4^-} + 2E_{\text{H}_3\text{O}^+}] \quad (8)$$

$$\Delta E_2 = [E_{\text{Ptriaz-CN-A (AuCl}_2^-)} + 2E_{\text{H}_3\text{O}^+} + 2E_{\text{HCl}}] - [E_{\text{Ptriaz-CN-A (AuCl}_4^-)} + 2E_{\text{H}_3\text{O}^+}] \quad (9)$$

$$\Delta E_3 = [E_{\text{Ptriaz-CN-A (Au)}} + 2E_{\text{H}_2\text{O}} + 2E_{\text{HCl}}] - [E_{\text{Ptriaz-CN-A (AuCl}_2\text{)}} + 2E_{\text{H}_3\text{O}^+}] \quad (10)$$

$$\Delta E_4 = [E_{\text{Ptriaz-CN-A (Au-AuCl}_4\text{)}} + 2E_{\text{H}_2\text{O}}] - [E_{\text{Ptriaz-CN-A (Au)}} + 2E_{\text{H}_2\text{O}} + E_{\text{AuCl}_4}] \quad (11)$$

All the structures are geometrically optimized by TPSSH/def2-SVP, and used TPSSH/def2-TZVP to calculate the energy.

### 3.2 Chemical values calculations

When the spin multiplicity is 1, according to the Koopmans theory, hardness = fundamental gap  $\approx$  HOMO-LUMO gap, VIP  $\approx$  -E(HOMO), VEA  $\approx$  -E(LUMO), Mulliken electronegativity  $\approx$  -1/2 (VIP+VEA), chemical potential  $\approx$  1/2 (VIP+VEA).

When the spin multiplicity is 2, conceptual density functional theory (CDFT), we can directly calculate the wave function and energy of N, N+1, N-1 electronic states, and then obtain the parameters.

## 4. Streamlined life cycle assessment (LCA)

Environmental impacts of Ptriaz-CN-A production were analyzed using the “cradle-to-gate” LCA approach. LCA is a systematic tool for determining the environmental impact of a product or a process across its entire life cycle or a portion of its life cycle (ISO 14040, ISO 14044). The life cycle environmental impacts were modeled using Simapro software (version 9.0) with Ecoinvent databases as inventories. TRACI 2.1 (tool for the reduction and assessment of chemical and other environmental impacts) was used as the assessment method. For this study, ten impact categories have been selected: (a) ozone depletion (OD; kg CFC-11 equivalent), (b) global warming potential (GW; kg CO<sub>2</sub> eq), (c) smog (SM; kg O<sub>3</sub> eq), (d) acidification (AC; mol SO<sub>2</sub> eq), (e) eutrophication (ET; kg N eq), (f) carcinogenic (HHC; CTUh), (g) noncarcinogenic (HHNC; CTUh), (h) respiratory effects (RE; kg PM<sub>2.5</sub> eq), (i) ecotoxicity (EC; CTUe), and (j) fossil fuel depletion (FFD; MJ surplus). It should be noted that some parameters are not considered due to the lack of source data of relevant



chemicals/processes. Therefore, it should be treated with caution when applying for other synthetic processes or materials.

#### **4.1 System boundary and functional unit**

Overall system boundary used in the current study is depicted in Fig. S38. The stage consists of six major stages: (1) synthesis of TriazoleBr, (2) synthesis of P2 drying as drying method; Scale-2: data based on the maximum production scale of the laboratory. In Scale-2, considering that the supercritical CO<sub>2</sub> drying equipment in the laboratory can only handle limited amounts of samples each time, freeze-drying is chosen as the final drying method. As presented in the Fig. S37, the inputs (raw materials and electricity usage) and outputs (1 g P

#### **4.2 Data collection and inventory**

The Life Cycle Inventory (LCI) was obtained by collecting inventory data from the laboratory logs, analytical procedures, and material energy balances. The uncertainty analysis was performed using Monte Carlo simulation with uniform distribution of the range of parameters with 1000 iterations. Furthermore, uncertainty range from the Monte Carlo simulation, where the upper bound representing the 95 percentile and the lower bound representing the 5 percentile are also include. The detailed information about LCI is presented in Table S11 to Table S15.

#### **4.3 Discussions**

Environmental impacts of P

6a. It is clear that the P<sub>triaz</sub>-CN-A prepared at Scale-2 has much lower environmental impacts across all categories. This is due to the reason that equipment can be operated under full load conditions and resources can be maximized. This indicates that there is much room to reduce the environmental impact of P<sub>triaz</sub>-CN-A production when they are produced on an industrial scale.

As shown in Fig. S38a and Fig. S38b, for ozone depletion, the proportion of environmental influence of Synthesis Stage-3 phase is relatively large, accounting for 58 % and 94 % in Scale-1 and Scale-2, respectively (Table S16 and Table S23). Moreover, in the OD impact category of Synthesis Stage-3, LiTFSI has the highest proportion of environmental impact, contributes more than 99 % (Table S19 and Table S26). This may be attributed to a large amount of LiTFSI is used in this process to exchange counterions, and TFSI anion containing F in aqueous solution may be discharged into the environment as ozone depleting substances. Of the other nine impact categories besides OD, the Synthesis Stage-1 and Drying process phases have a greater proportion of environmental impact, contribute 29 % ~ 42 % and 31 % ~ 43 % in Scale-1, 24 % ~ 43 % and 15 %~34 % in Scale-2, respectively (Table S17, Table S22, Table S24 and Table S29). This can be attributed to the use of 1-vinyl-1,2,4-triazole and bromoacetonitrile, which may be harmful to the environment. Moreover, the relatively higher power consumption of equipment during synthesis and drying process can also have an impact on the environment. For Synthesis Stage-2, TIPS Process and Crosslink & Solvent exchange Process, the environmental impacts of these preparation process in the P<sub>triaz</sub>-CN-A production are relatively small, contribute approximately 1 %~16 %, 2 %~22 % and 0.2 %~30 % environmental impact proportions among the other nine impact categories (Table S16 and Table S23).

## 5. Cost analysis

Cost analysis of raw materials and electricity in P<sub>triaz</sub>-CN-A preparation process in two different scales are presented in the main text, Fig. 6b, the detailed data are summarized in Table S30 and Table S31, along with the corresponding calculated production energy. All data (price of electricity in Shanghai, price of raw materials and gold price in China) were obtained in October, 2022. And all data were at the lab-scale. From Fig. 6b, the production cost for synthesis of 1 g P<sub>triaz</sub>-CN-A in Scale-1 and Scale-2 is around 116.988 CNY and 107.280 CNY, respectively, and more than 95 % of which are spent on raw materials. Although this production cost seems high, it should be noted that the cost here is based on our laboratory data. It is clear that the cost preparation is reduced when we scale up production under laboratory conditions (Scale-2). Therefore, the preparation cost of this adsorbent can be greatly reduced when it is mass-produced in the industry. For instance, reducing the cost of 1-vinyl-1,2,4-triazole preparation from the source in industry is crucial to reduce the production cost of P<sub>triaz</sub>-CN-A. Now, commercially available 1-vinyl-1,2,4-triazole is mainly obtained by the addition reaction of acetylene to triazoles. Though, the required synthetic source materials, 1,2,4-triazole and acetylene, are particularly cheap, it is possible that 1,2,4-triazole is not yet widely used, and the small batch production of this monomer in the Lab make this monomer very expensive (Table. S32). Instead, the 1-vinyl imidazole prepared in the same way is so widely used in industry that large-scale preparation makes it very cheap. Therefore, on the basis of the above-mentioned considerations, P<sub>triaz</sub>-CN-A would have broad prospects of application to new adsorbing agent.

## Supplementary Figures

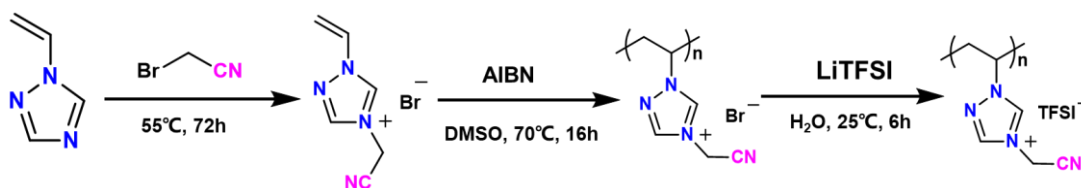

**Fig. S1** Schematic illustration of synthesis procedures for Ptriaz-CN

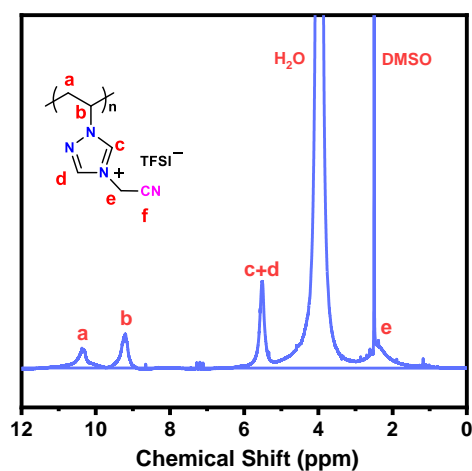

**Fig. S2** <sup>1</sup>H NMR spectra of poly(4-cyanomethyl-1-vinyl-1,2,4-triazolium bis(trifluoromethanesulfonyl)imide) (Ptriaz-CN). Source data are provided as a Source Data file.

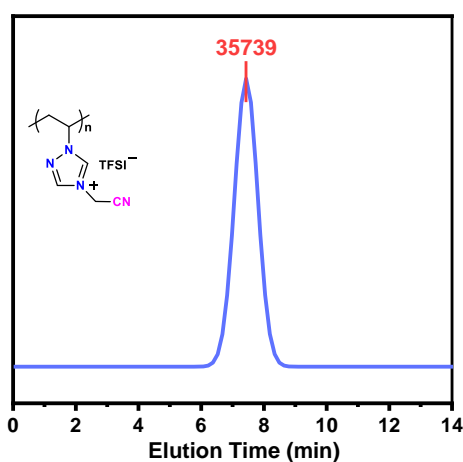

**Fig. S3** GPC curves measured (in DMF) for Ptriaz-CN. (The apparent number-average molecular weight and PDI value are 35739 g/mol and 2.14, respectively.) Source data are provided as a Source Data file.

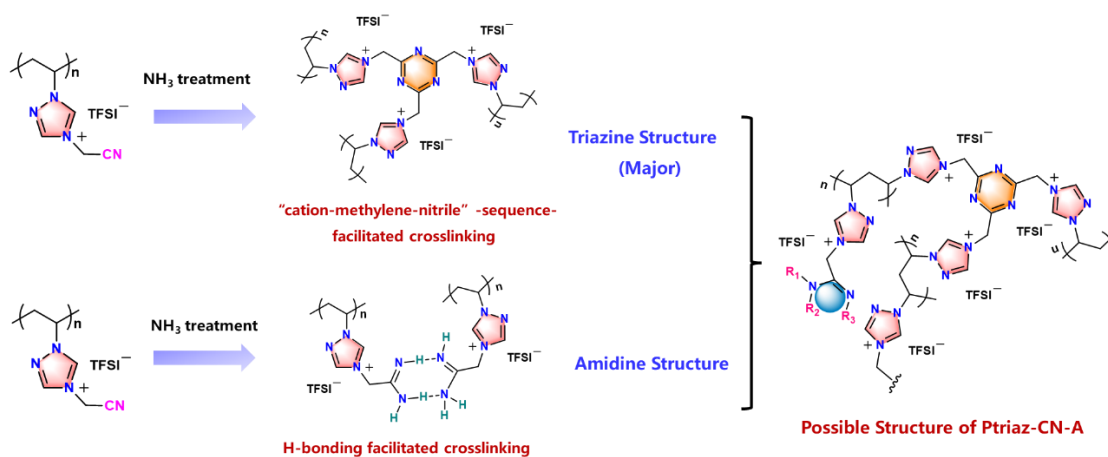

**Fig. S4** Chemical reactions with both amidine and triazine structures for Ptiaz-CN-A formation paths.

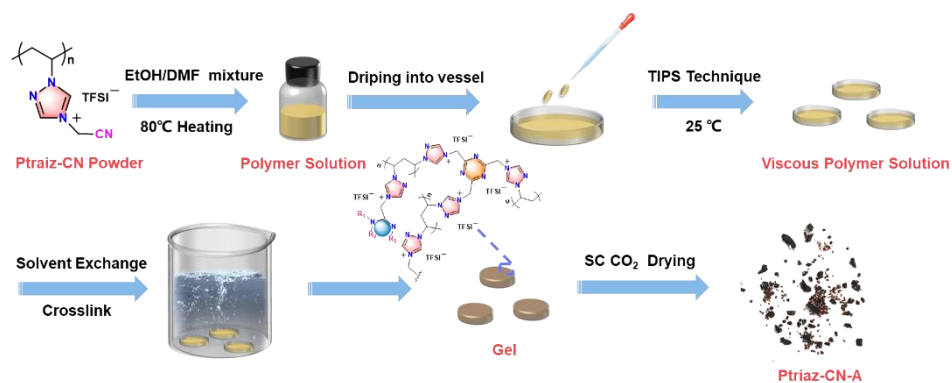

**Fig. S5** General pathway toward mesoporous Ptiaz-CN-A

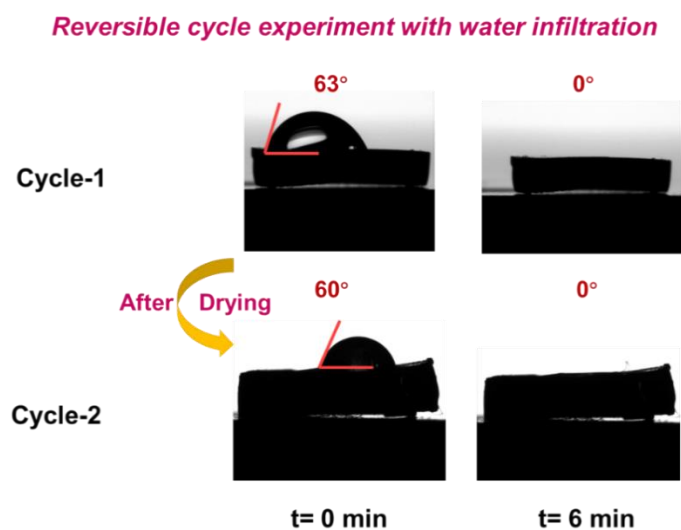

**Fig. S6** Wetting process and water contact angle measurement of the Ptiaz-CN-A. It took 6 min for the contact layer to change from the hydrophobic to the hydrophilic.

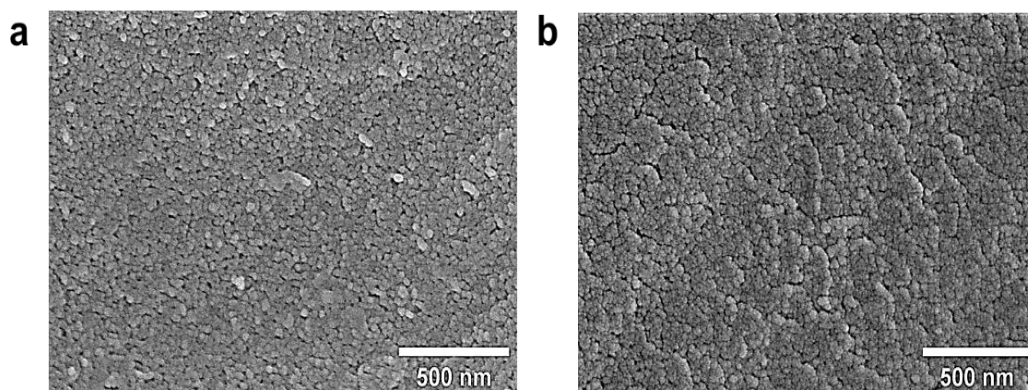

**Fig. S7** The SEM images of Ptiaz-CN-A. (a) Original Ptiaz-CN adsorbent, (b) Ptiaz-CN adsorbent after water infiltration.

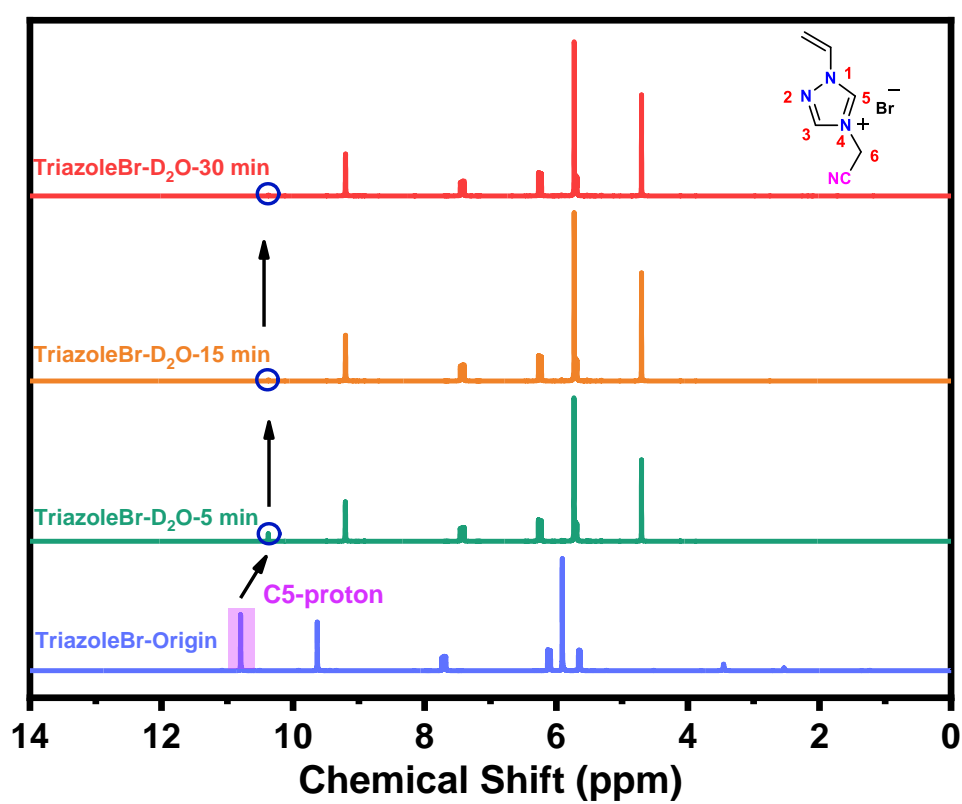

**Fig. S8** Time-dependent  $^1\text{H}$ -NMR test of proton exchange of TriazoleBr. Source data are provided as a Source Data file.

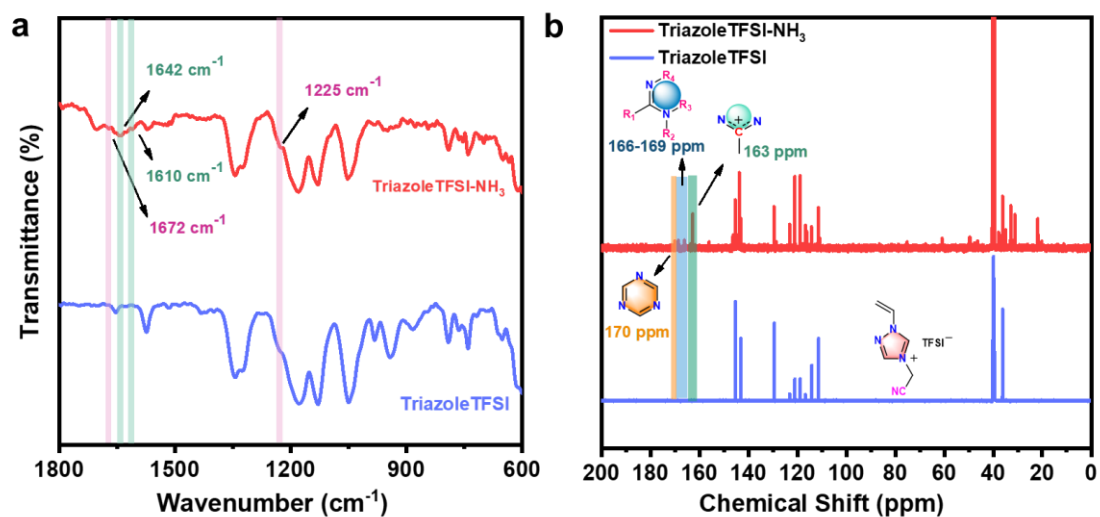

**Fig. S9 (a)** FT-IR and **(b)**  $^{13}\text{C}$  NMR spectra of unpolymerized precursor-TriazoleTFSI (bottom line) and  $\text{NH}_3$  treated TriazoleTFSI (top line). Source data are provided as a Source Data file.

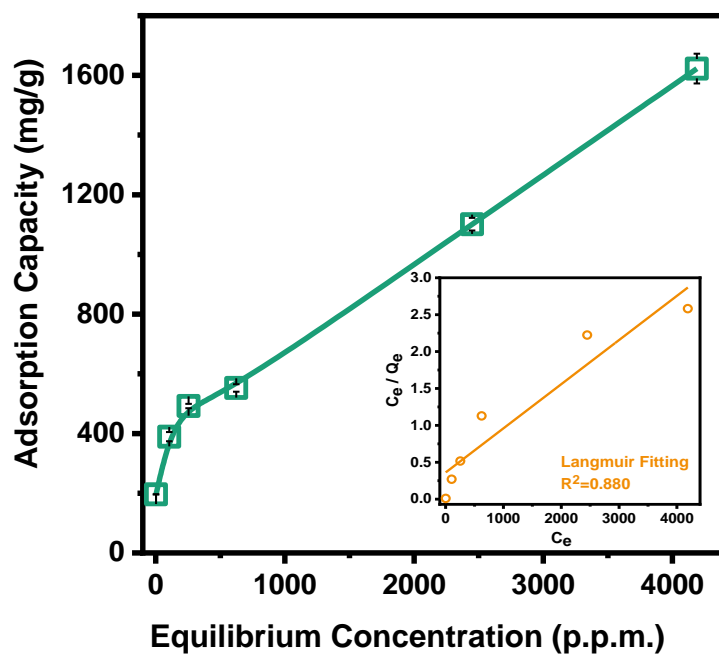

**Fig. S10.** Adsorption isotherm of  $\text{Pt}^{2+}$  on Ptri az-CN-A and related Langmuir isotherm fitting ( $R^2=0.880$ ). Error bars represent standard deviation.  $n=3$  independent experiments. Source data are provided as a Source Data file.

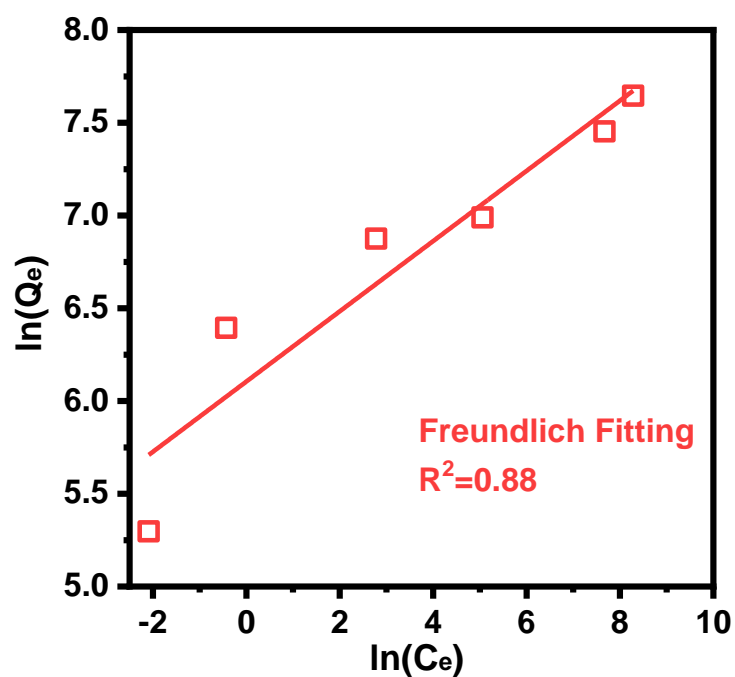

**Fig. S11** Freundlich adsorption isotherm fitting of  $\text{Au}^{3+}$  on Ptri az-CN-A. Source data are provided as a Source Data file.



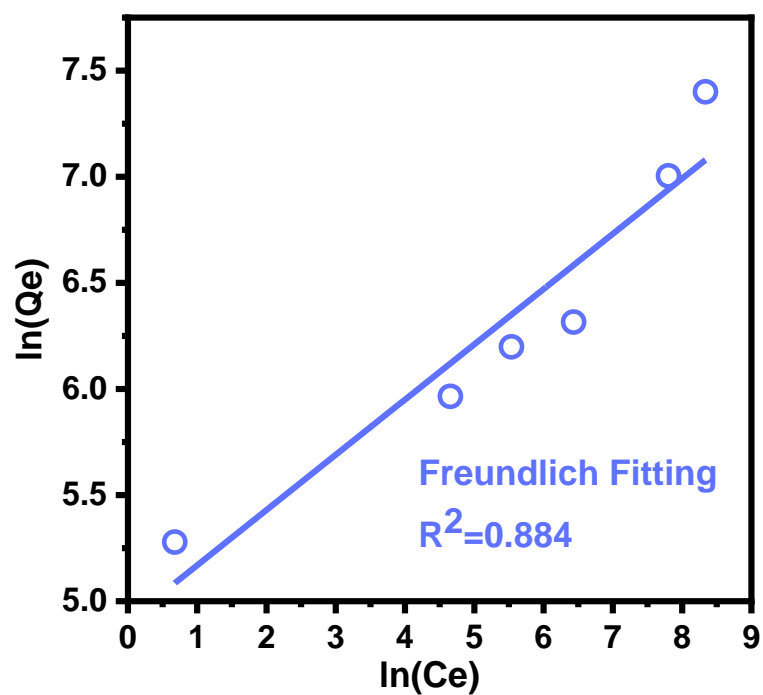

**Fig. S12** Freundlich adsorption isotherm fitting of  $\text{Pt}^{2+}$  on Ptriz-CN-A. Source data are provided as a Source Data file.

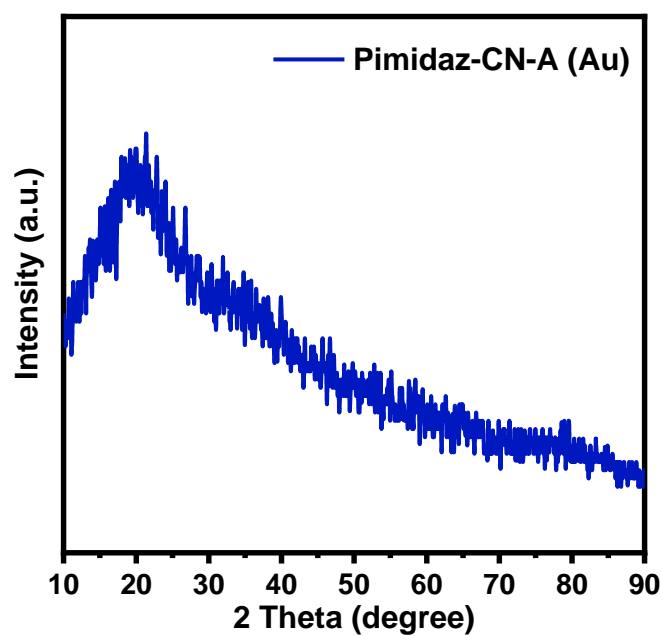

**Fig. S13** XRD patterns for Au-loaded Pimidaz-CN-A. Source data are provided as a Source Data file.

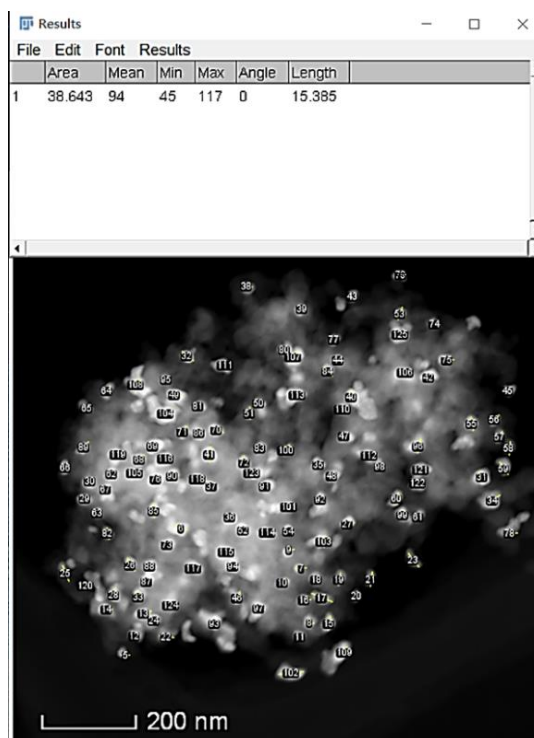

**Fig. S14** Statistics on the Au particle size of Au-loaded Ptri az-CN-A by ImageJ software.

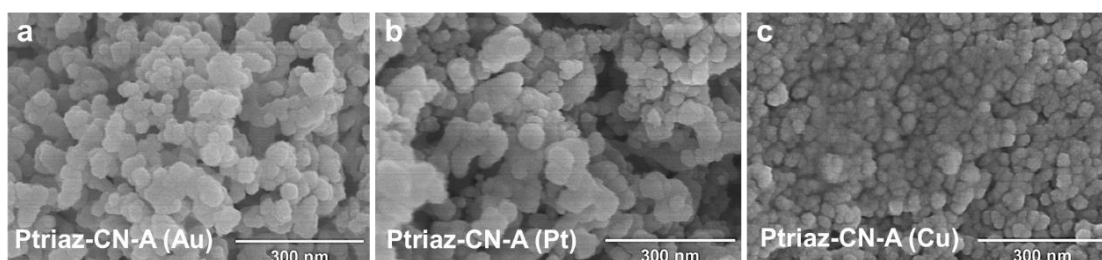

**Fig. S15** The SEM images of metal loaded Ptri az-CN-A. (a) Ptri az-CN-A (Au), (b) Ptri az-CN-A (Pt), (c) Ptri az-CN-A (Cu).

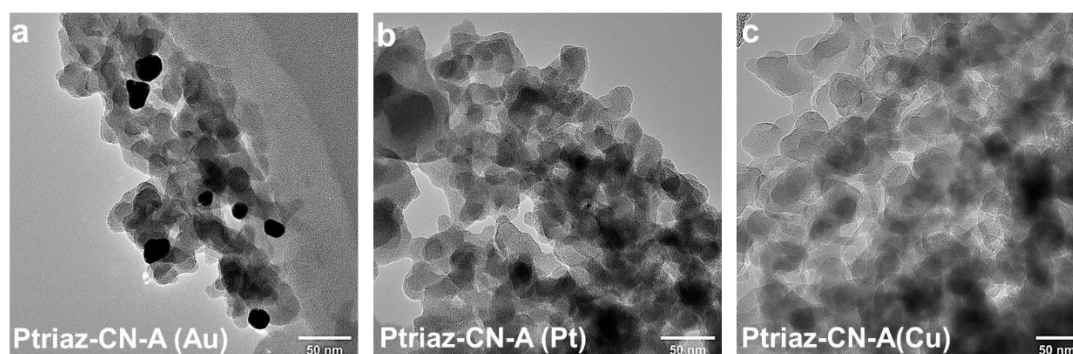

**Fig. S16** The TEM images of metal loaded Ptri az-CN-A. (a) Ptri az-CN-A (Au), (b) Ptri az-CN-A (Pt), (c) Ptri az-CN-A (Cu).

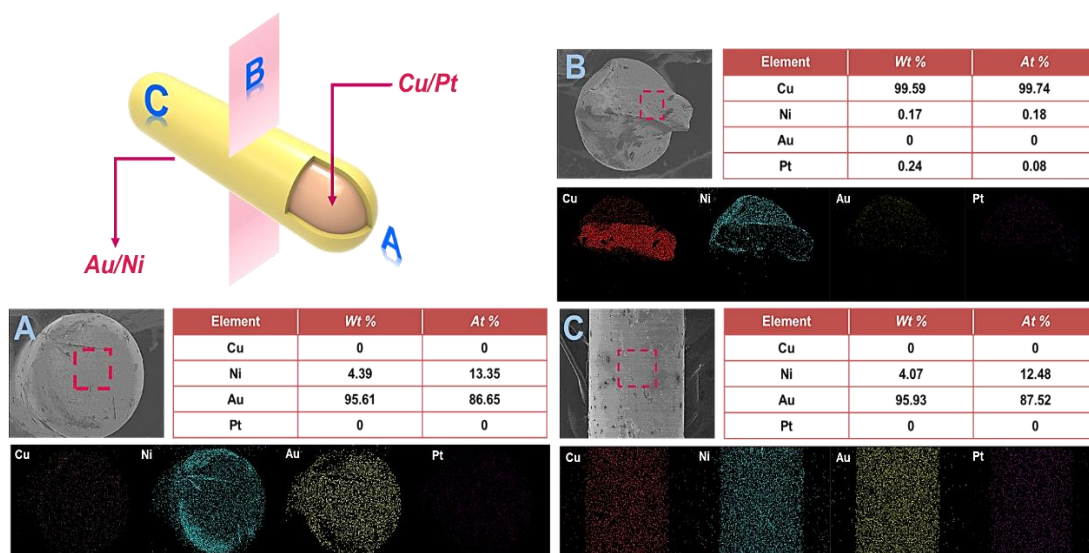

**Fig. S17** The corresponding EDX and SEM mapping spectra showing the elemental composition on the point of pin (A), cross section of pin (B) and surface of pin (C).

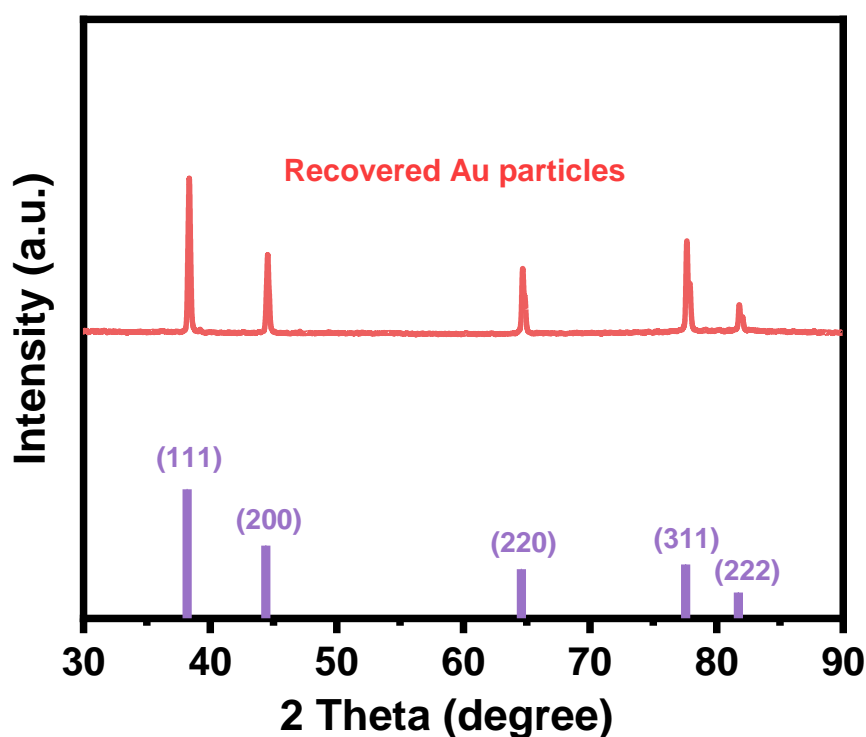

**Fig. S18** XRD pattern of Au nanoparticles that was purified from Ptriz-CN-A. The pattern indicates that  $\text{Au}^{3+}$  is reduced to  $\text{Au}^0$  after treatment with the Ptriz-CN-A. Source data are provided as a Source Data file.

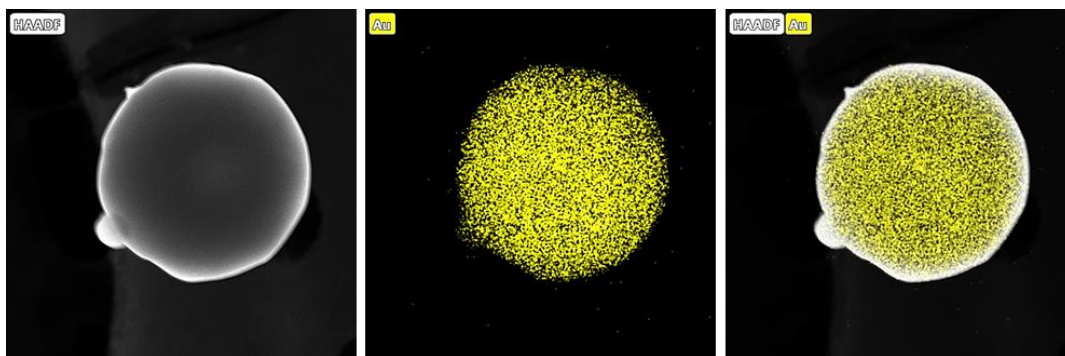

**Fig. S19** STEM image and elemental mapping for recovered gold particles.

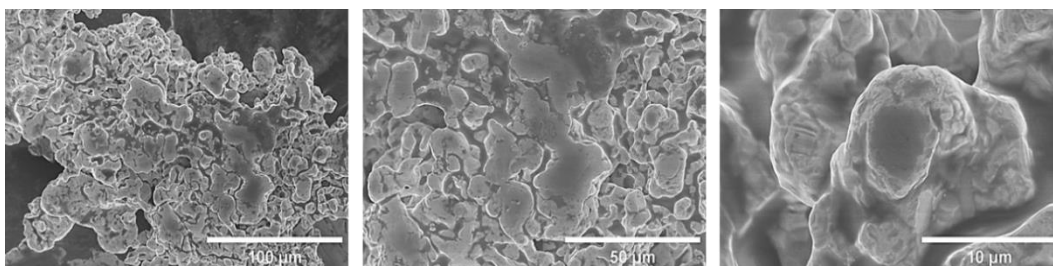

**Fig. S20** SEM images of recovered gold particles.

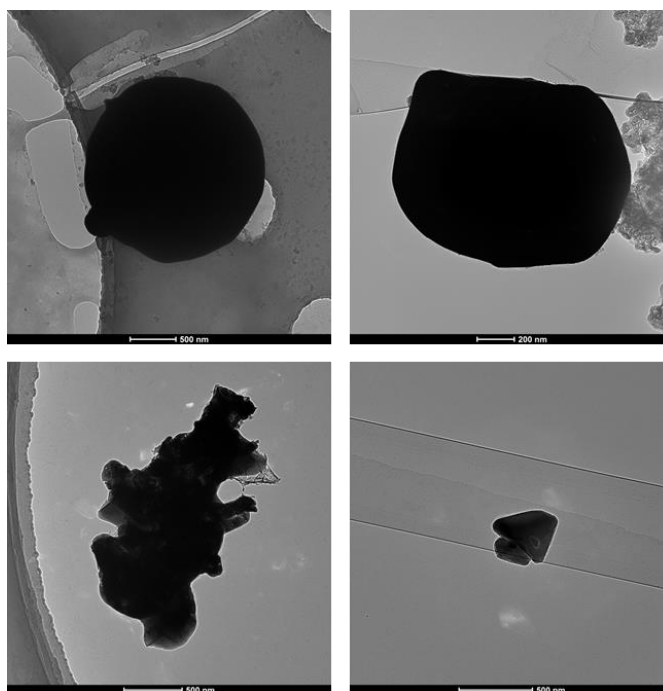

**Fig. S21** TEM images of recovered gold particles.

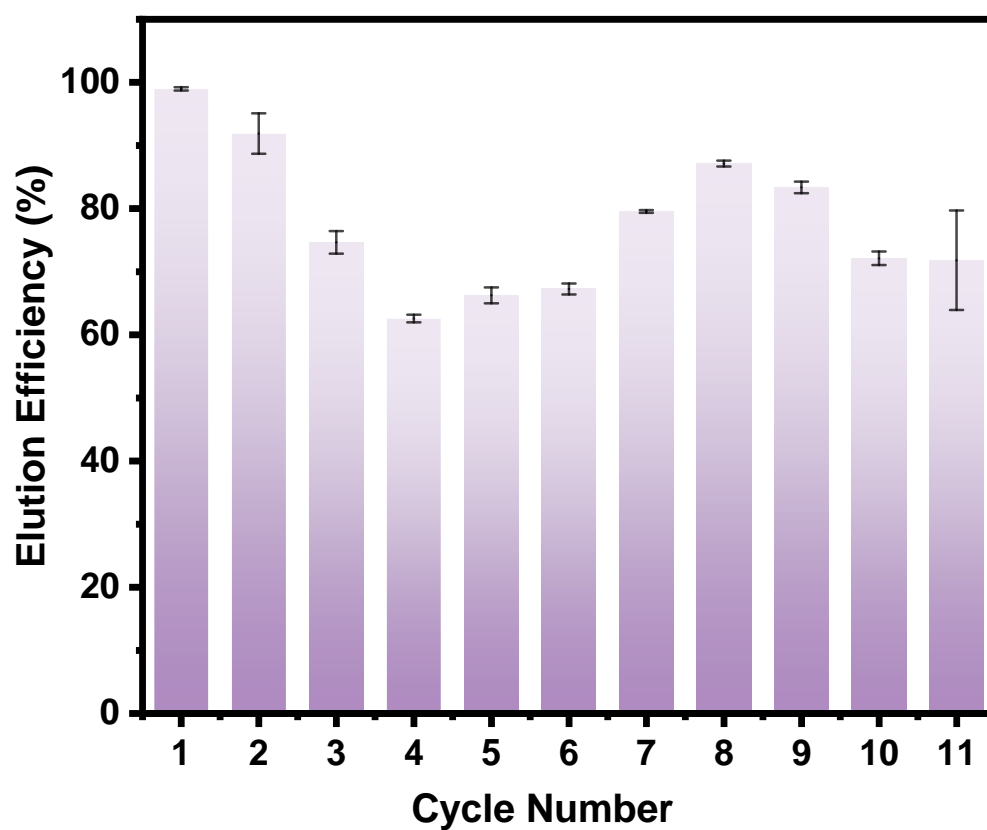

**Fig. S22** Elution efficiency of the gold-loaded P-CN-A in desorption cycles. Error bars represent standard deviation. n=3 independent experiments. Source data are provided as a Source Data file.

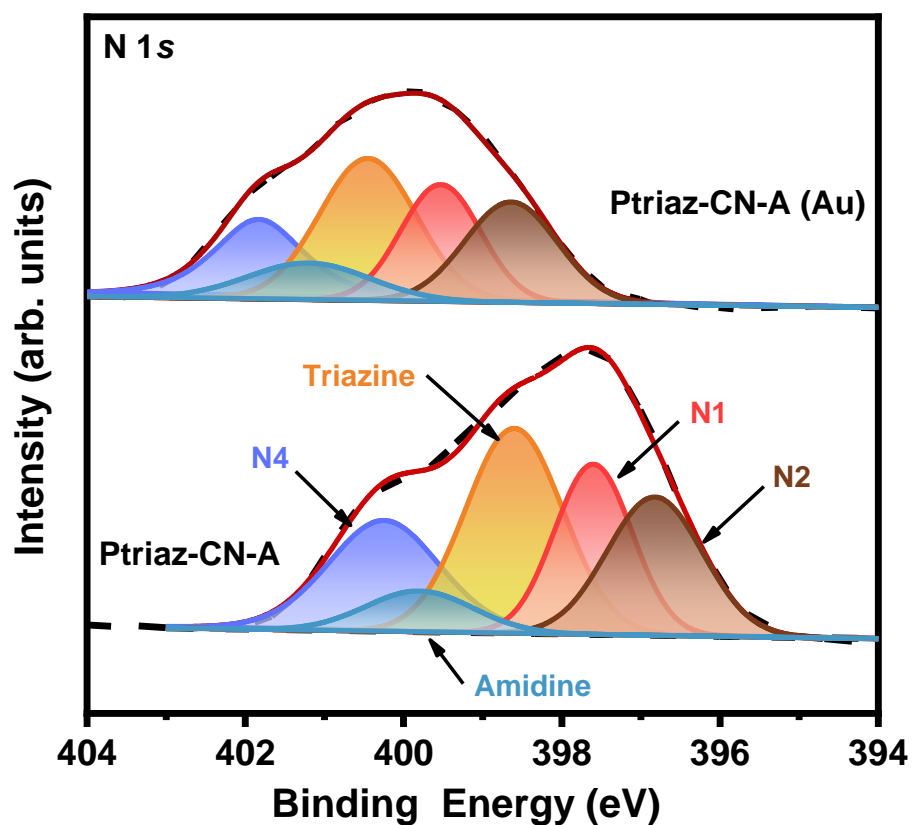

**Fig. S23** The N 1s XPS spectra of Ptriaz-CN-A before and after  $\text{Au}^{3+}$  adsorption. The coloured shadings represent the internal integral area of different characteristic peaks. N4 (purple), Amidine (blue), Triazine (orange), N1 (red) and N2 (brown). Source data are provided as a Source Data file.

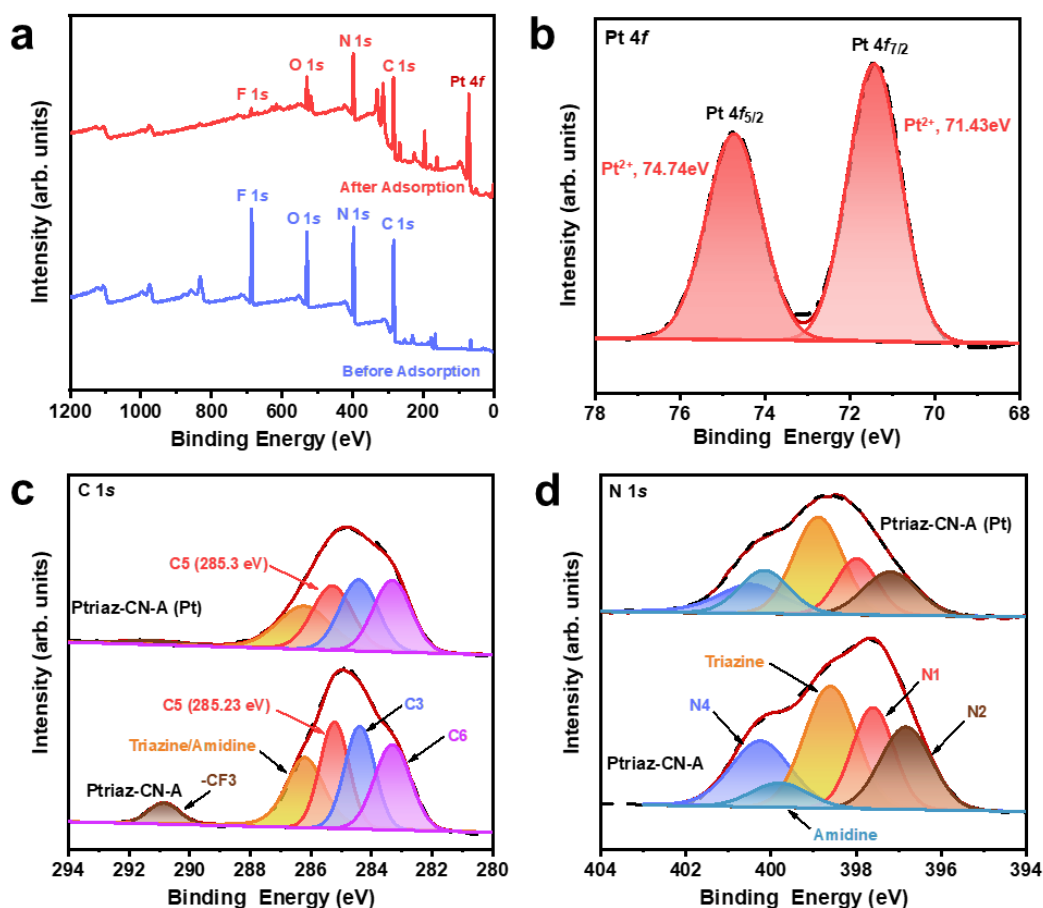

**Fig. S24** (a) XPS full spectra of Ptri az-CN-A before and after Pt<sup>2+</sup> adsorption. (b) High-resolution XPS spectra of Pt 4f after Pt<sup>2+</sup> adsorption. The coloured shadings represent the internal integral area of different characteristic peaks. Pt<sup>2+</sup> (red). (c) The C 1s XPS spectra of Ptri az-CN-A before and after Pt<sup>2+</sup> adsorption. The coloured shadings represent the internal integral area of different characteristic peaks. C3 (purple), C6 (pink), Triazine/Amidine (orange), C5 (red) and -CF<sub>3</sub> (brown). (d) The N 1s XPS spectra of Ptri az-CN-A before and after Pt<sup>2+</sup> adsorption. The coloured shadings represent the internal integral area of different characteristic peaks. N4 (purple), Amidine (blue), Triazine (orange), N1 (red) and N2 (brown). Source data are provided as a Source Data file.

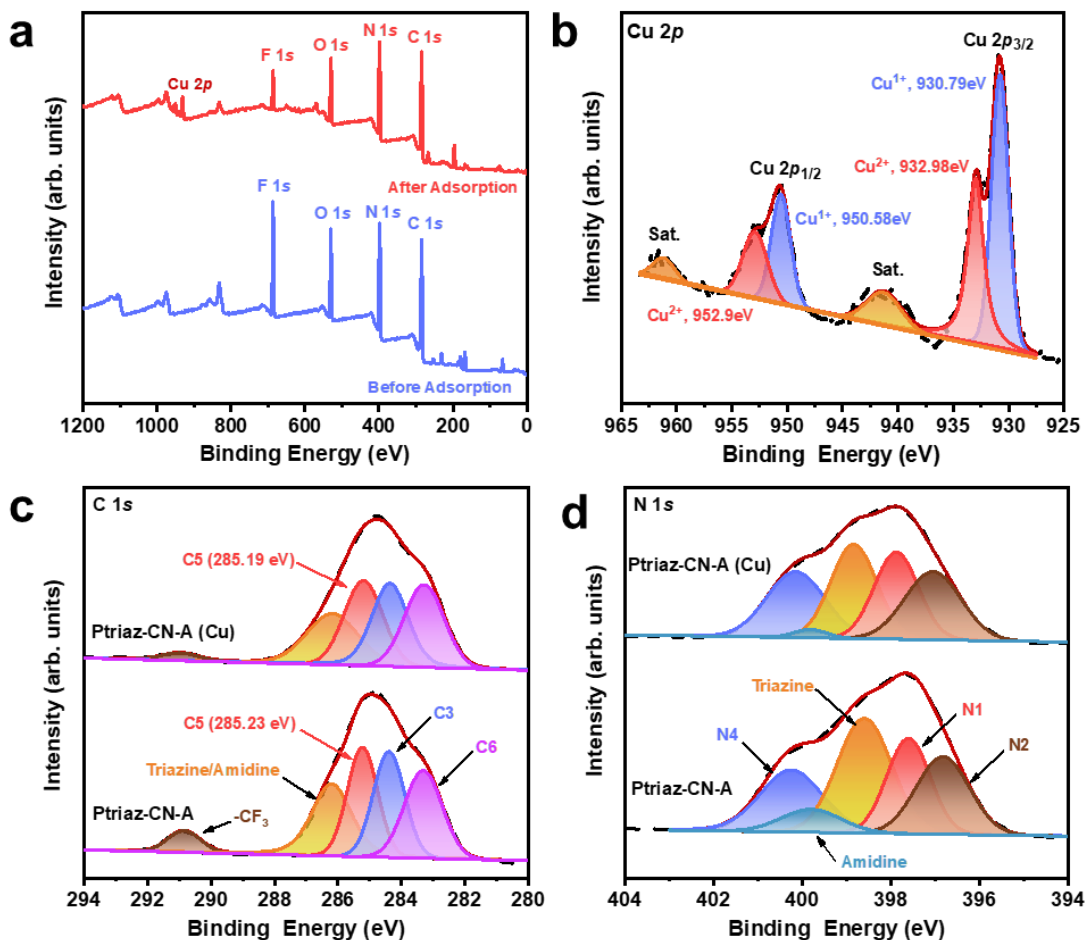

**Fig. S25** (a) XPS full spectra of Ptriz-CN-A before and after  $\text{Cu}^{2+}$  adsorption. (b) High-resolution XPS spectra of Cu 2p after  $\text{Cu}^{2+}$  adsorption. The coloured shadings represent the internal integral area of different characteristic peaks.  $\text{Cu}^{2+}$  (red) and  $\text{Cu}^{1+}$  (purple). (c) The C 1s XPS spectra of Ptriz-CN-A before and after  $\text{Cu}^{2+}$  adsorption. The coloured shadings represent the internal integral area of different characteristic peaks. C3 (purple), C6 (pink), Triazine/Amidine (orange), C5 (red) and -CF<sub>3</sub> (brown). (d) The N 1s XPS spectra of Ptriz-CN-A before and after  $\text{Cu}^{2+}$  adsorption. The coloured shadings represent the internal integral area of different characteristic peaks. N4 (purple), Amidine (blue), Triazine (orange), N1 (red) and N2 (brown). Source data are provided as a Source Data file.



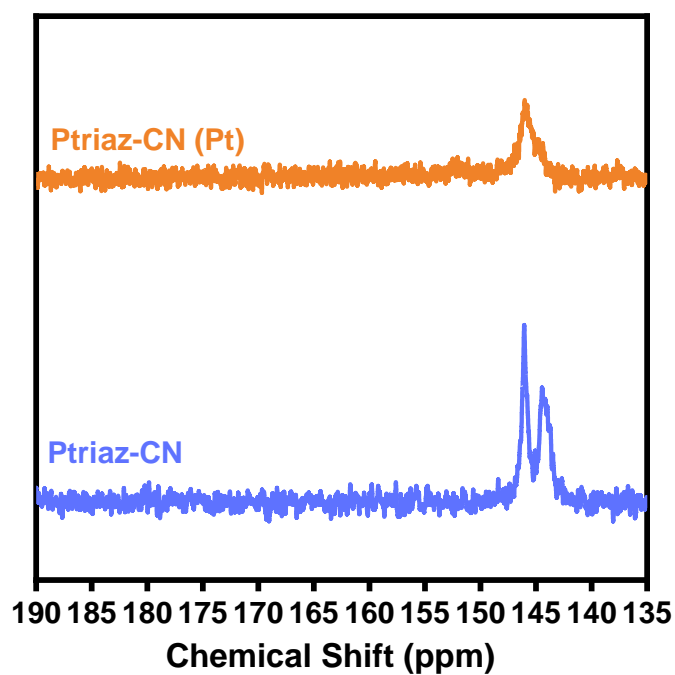

**Fig. S26**  $^{13}\text{C}$  NMR spectra of Ptrial-CN and Ptrial-CN (Pt). Source data are provided as a Source Data file.

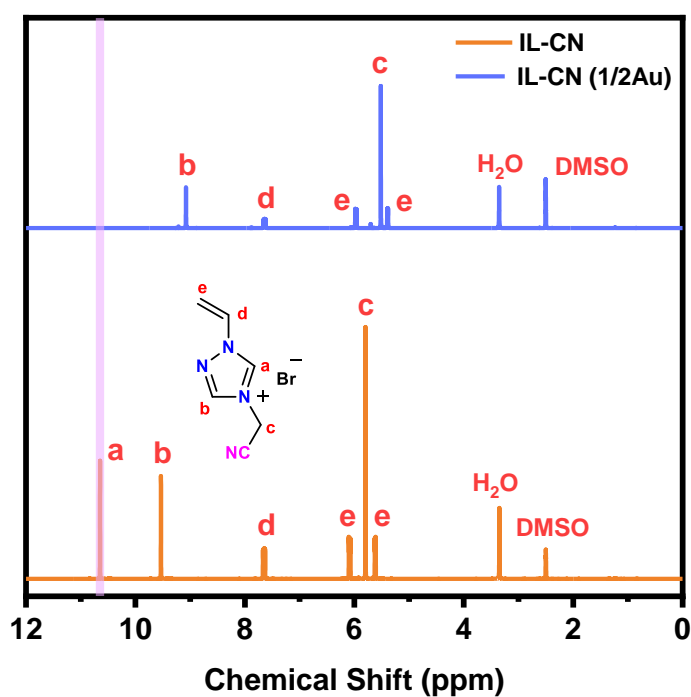

**Fig. S27**  $^1\text{H}$  NMR spectra of ionic liquids monomer 4-cyanomethyl-1-vinyl-1,2,4-triazolium bromide (IL-CN) and IL-CN (1/2Au). Source data are provided as a Source Data file.

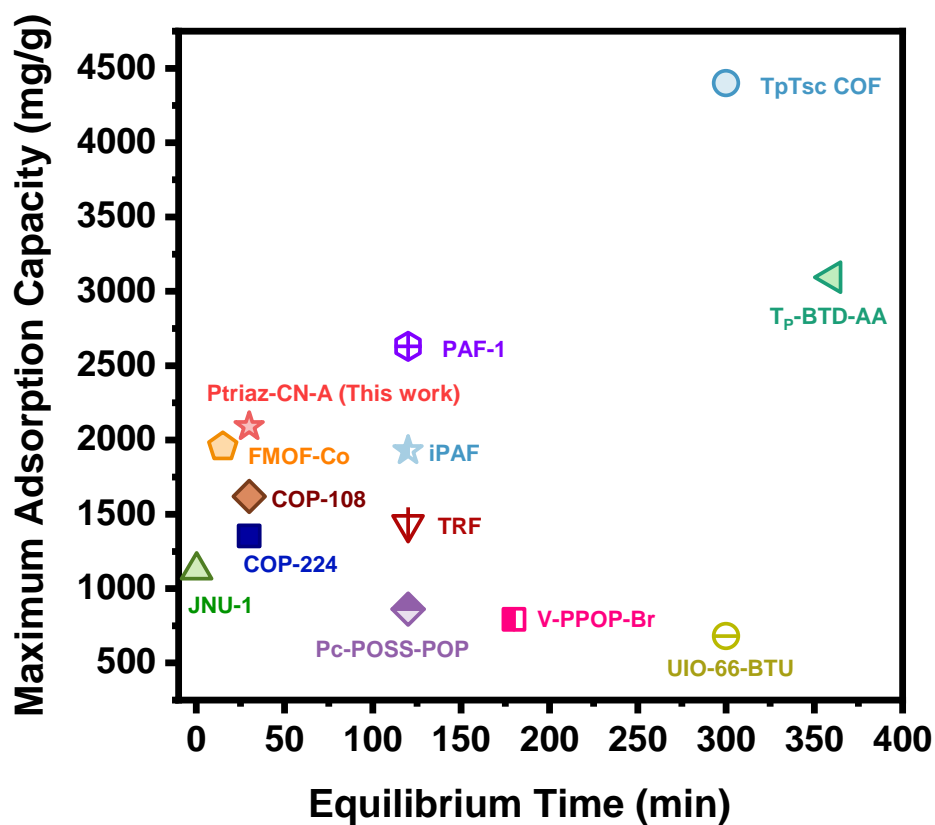

**Fig. S28** Comparison of maximum adsorption capacity and equilibrium adsorption time of Ptiaz-CN-A with adsorbents reported in the literature. Source data are provided as a Source Data file.

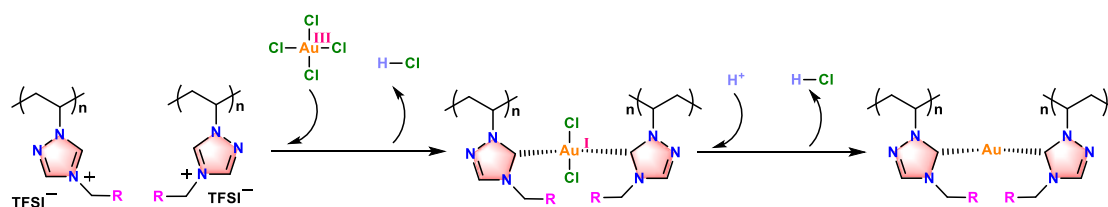

**Fig. S29** Bigger geometry for Fig. 5a in main text.

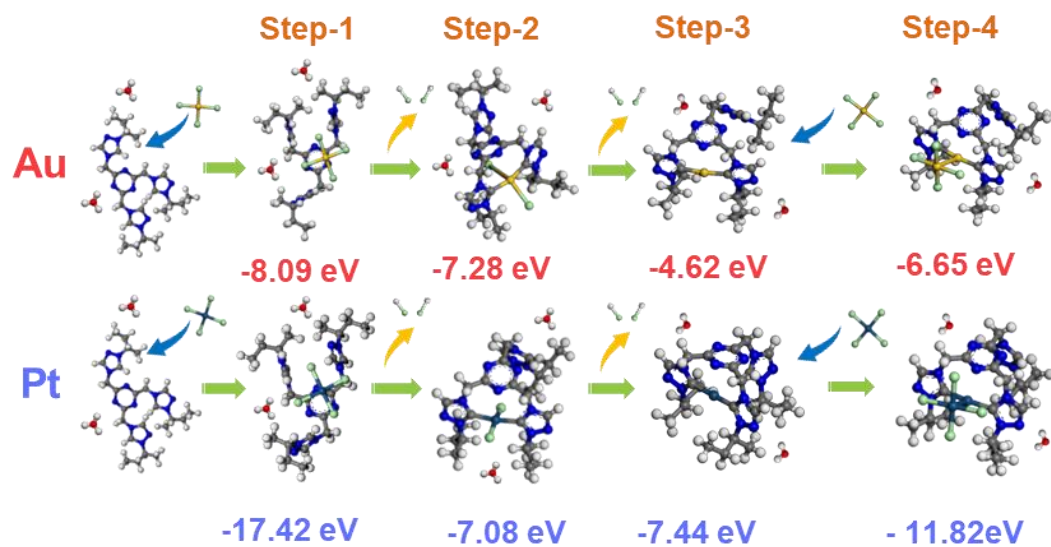

Fig. S30 Bigger geometry for Fig. 5b in main text.

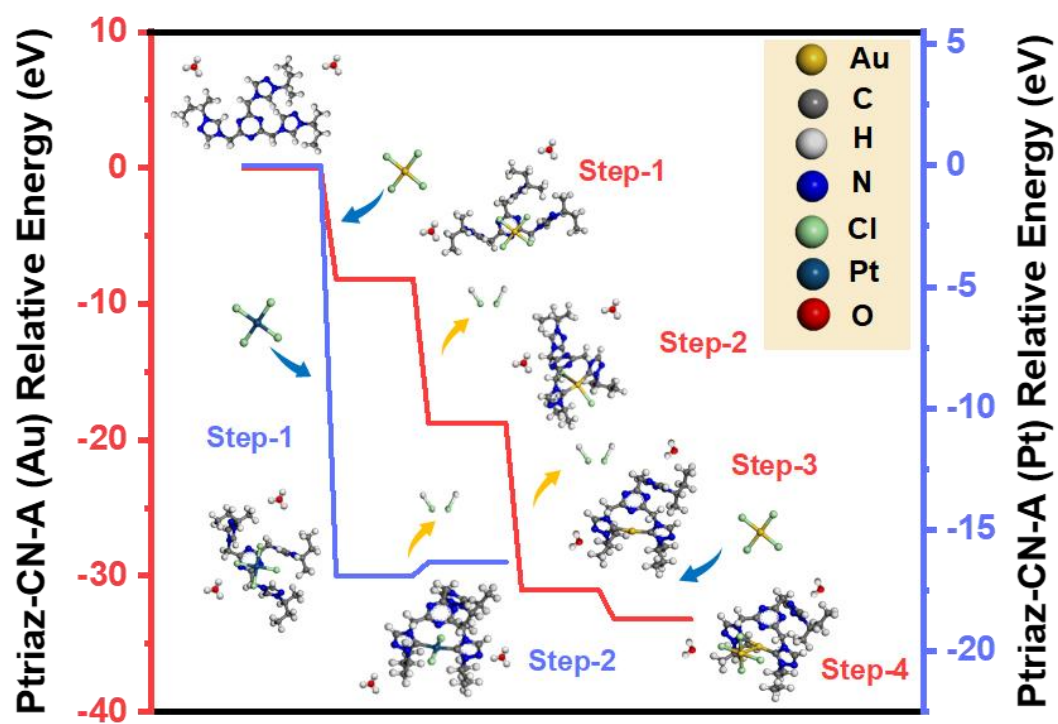

Fig. S31 Bigger geometry for Fig. 5c in main text.

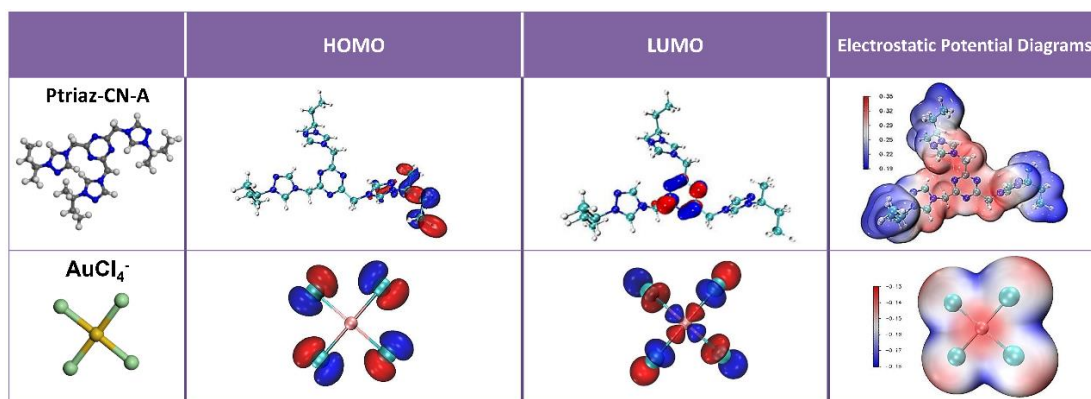

**Fig. S32** HOMO and LUMO representations and electrostatic potential diagrams of Ptriaz-CN-A model unit and AuCl<sub>4</sub><sup>-</sup>.

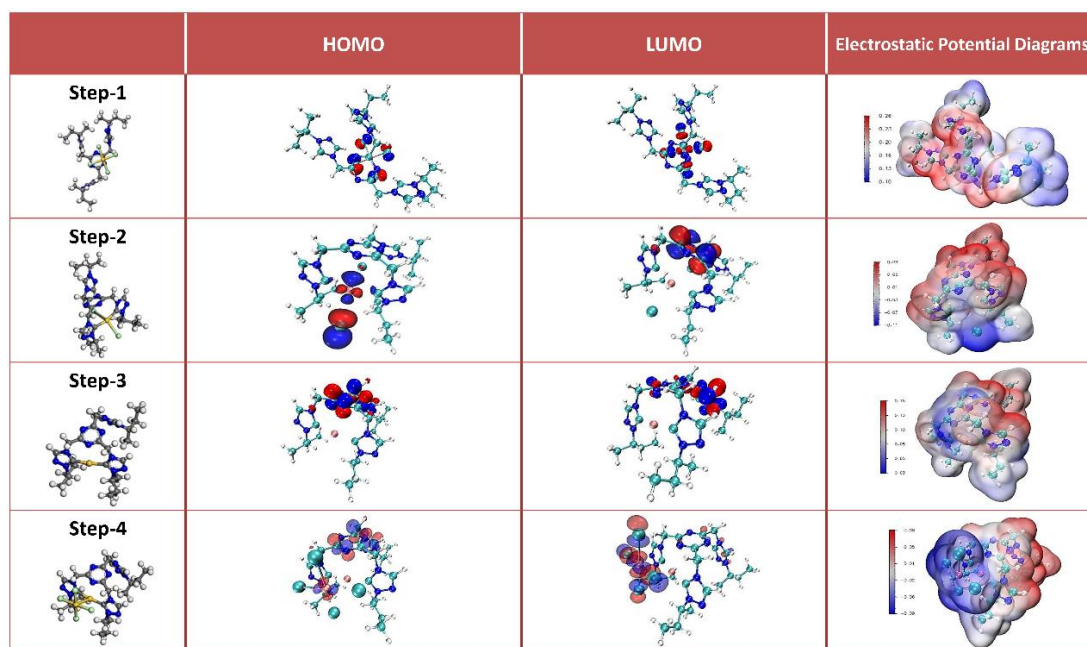

**Fig. S33** HOMO and LUMO representations and electrostatic potential diagrams in adsorption process of AuCl<sub>4</sub><sup>-</sup> on a model unit of Ptriaz-CN-A.

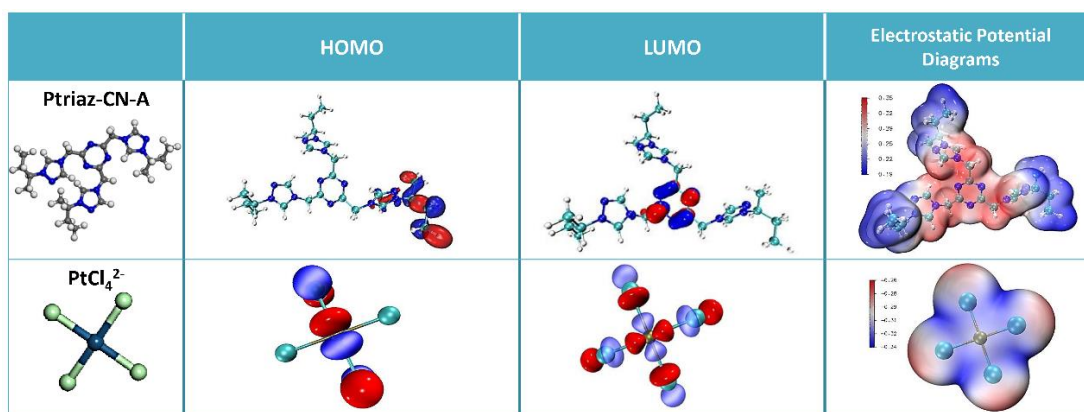

**Fig. S34** HOMO and LUMO representations and electrostatic potential diagrams of Ptriaz-CN-A model unit and PtCl<sub>4</sub><sup>2-</sup>.

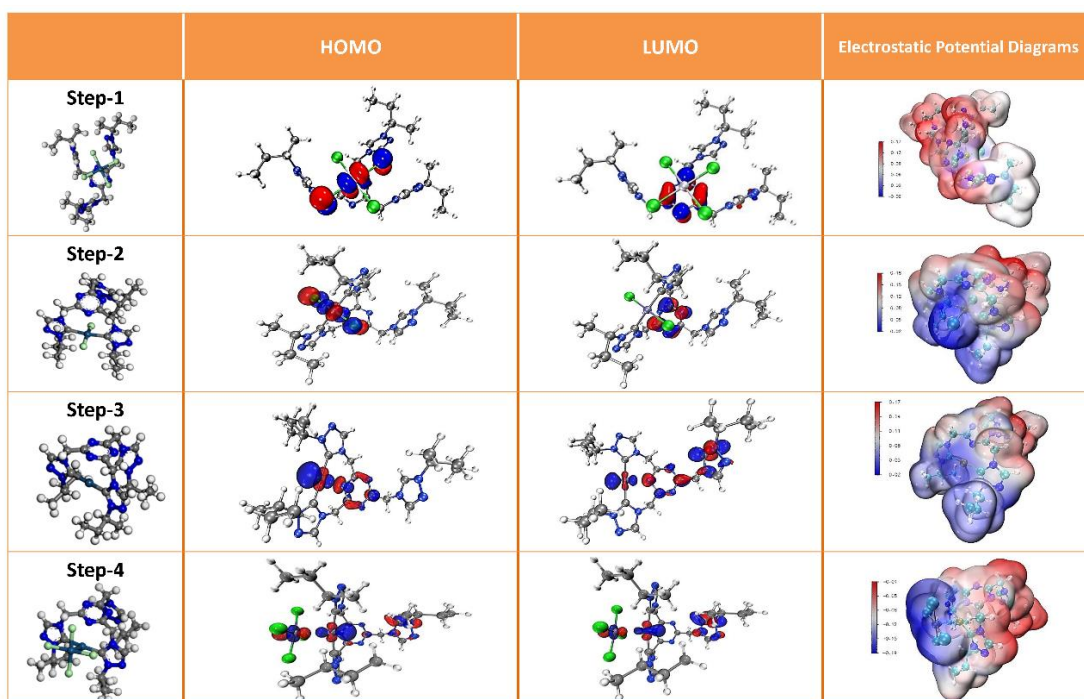

**Fig. S35** HOMO and LUMO representations and electrostatic potential diagrams in adsorption process of PtCl<sub>4</sub><sup>2-</sup> on a model unit of Ptriaz-CN-A.

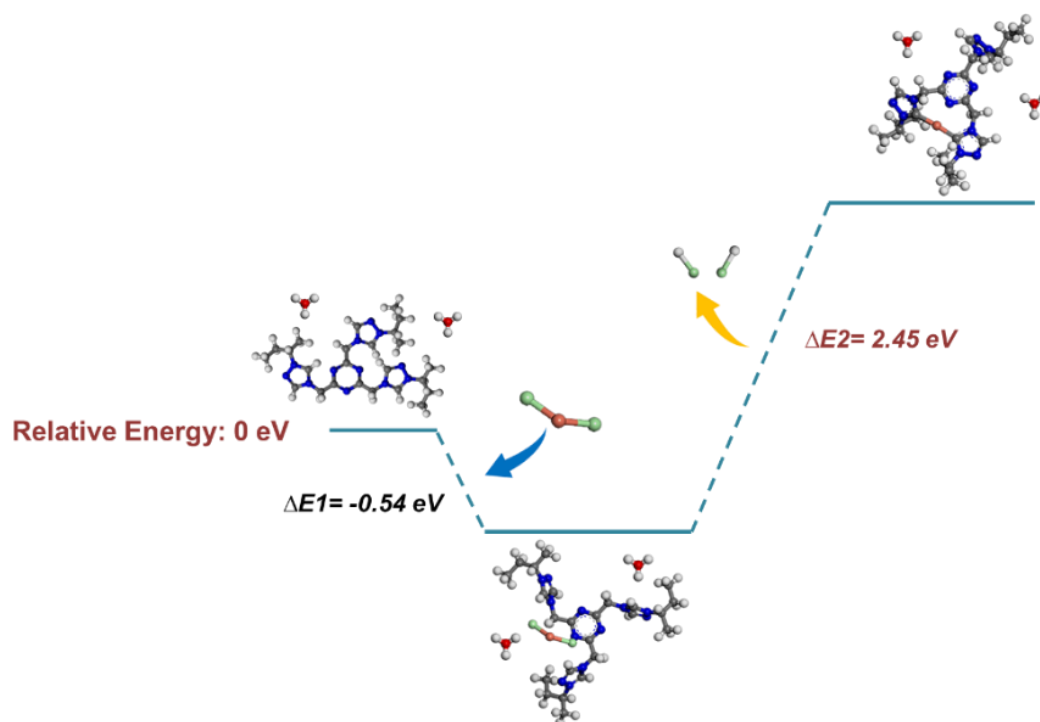

**Fig. S36** DFT calculated energy differences in adsorption process of  $\text{CuCl}_2$  on a model unit of P-triaz-CN-A.



## Supplementary Tables

**Table S1** Comparison of **maximum adsorption capacity** for  $\text{Au}^{3+}$

| <i>Material</i>    | <i>Adsorbent<br/>Dose(mg)</i> | <i>Au<sup>3+</sup> Initial<br/>Conc. (ppm)</i> | <i>Adsorption<br/>Time(h)</i> | <i>Q<sub>max</sub><br/>(mg/g)</i>                | <i>Ref.</i>          |
|--------------------|-------------------------------|------------------------------------------------|-------------------------------|--------------------------------------------------|----------------------|
| <i>TpTsc COF</i>   | 5                             | 100~1500                                       | 48                            | 4400.23                                          | <b>6</b>             |
| <i>PAF-1</i>       | 5                             | 20~500                                         | 48                            | 2629.87                                          | <b>7</b>             |
| <i>Tp-BTD-AA</i>   | 2                             | 25~1200                                        | 6                             | 3094.6<br>Note: under irradiation<br>with 460 nm | <b>8</b>             |
| <i>Ptriaz-CN-A</i> | 5                             | 100~5000                                       | 24                            | <b>2090</b>                                      | <b>This<br/>work</b> |
| <i>FMOF-Co</i>     | 0.5                           | 100                                            | 8                             | 1953.7                                           | <b>9</b>             |
| <i>iPAF</i>        | 5                             | 20~500                                         | 48                            | 1927.3                                           | <b>10</b>            |
| <i>COP-108</i>     | 100                           | 20~5000                                        | 60                            | 1620                                             | <b>11</b>            |
| <i>TRF</i>         | 5                             | 100~600                                        | /                             | 1432                                             | <b>12</b>            |
| <i>COP-224</i>     | 10                            | 30~2000                                        | 48                            | 1354                                             | <b>13</b>            |
| <i>JNU-1</i>       | 5                             | 72~2030                                        | /                             | 1124                                             | <b>14</b>            |
| <i>Pc-POSS-POP</i> | 2                             | 50~500                                         | 24                            | 862.07                                           | <b>15</b>            |
| <i>V-PPOP-Br</i>   | 9                             | 180~500                                        | /                             | 792.22                                           | <b>16</b>            |
| <i>UiO-66-BTU</i>  | 10                            | 200~700                                        | 6                             | 680.2                                            | <b>17</b>            |



**Table S2** Comparison of the **equilibrium time** for Au<sup>3+</sup>

| <i>Material</i>    | <i>Adsorbent<br/>Dose(mg)</i> | <i>Au<sup>3+</sup> Initial<br/>Conc. (ppm)</i> | <i>Contact<br/>Time(h)</i> | <i>Equilibrium<br/>Time(min)</i> | <i>Ref.</i>          |
|--------------------|-------------------------------|------------------------------------------------|----------------------------|----------------------------------|----------------------|
| <i>TpTsc COF</i>   | 5                             | 300                                            | 48                         | 300                              | <b>6</b>             |
| <i>PAF-1</i>       | 50                            | 100                                            | 48                         | 120                              | <b>7</b>             |
| <i>Tp-BTD-AA</i>   | 2                             | 100                                            | 6                          | 360                              | <b>8</b>             |
| <i>Ptriaz-CN-A</i> | 5                             | 100                                            | 24                         | 30                               | <b>This<br/>work</b> |
| <i>FMOF-Co</i>     | 1                             | 100                                            | 16                         | 15                               | <b>9</b>             |
| <i>iPAF</i>        | 50                            | 100                                            | 48                         | 120                              | <b>10</b>            |
| <i>COP-108</i>     | 10                            | 0.1                                            | 24                         | 30                               | <b>11</b>            |
| <i>TRF</i>         | 5                             | 100                                            | 7                          | 120                              | <b>12</b>            |
| <i>COP-224</i>     | 10                            | 0.05                                           | 24                         | 30                               | <b>13</b>            |
| <i>JNU-1</i>       | 5                             | 396                                            | 2                          | 0.17                             | <b>14</b>            |
| <i>Pc-POSS-POP</i> | 9                             | 100                                            | 24                         | 120                              | <b>15</b>            |
| <i>V-PPOP-Br</i>   | 9                             | 155                                            | 5                          | 180                              | <b>16</b>            |
| <i>UiO-66-BTU</i>  | 10                            | 400                                            | 24                         | 300                              | <b>17</b>            |

**Table S3** The  $K_d$  values of multiple metal ions in simulated e-waste solution.

|       | <i>Coexisting Ions</i> |                  |                  |                  |                  |                  |                  |                  |
|-------|------------------------|------------------|------------------|------------------|------------------|------------------|------------------|------------------|
| $K_d$ | $\text{Au}^{3+}$       | $\text{Pt}^{2+}$ | $\text{Cu}^{2+}$ | $\text{Ni}^{2+}$ | $\text{Zn}^{2+}$ | $\text{Mg}^{2+}$ | $\text{Co}^{2+}$ | $\text{Cr}^{2+}$ |
|       | 1011.582               | 174.772          | 0.0948           | 0.4564           | 0.0882           | 0.548            | 0.0357           | 1.712            |

**Table S4** Metal content of authentic electronic wastewater (duplicated test).

| Element | Test-1              | Test-2              |
|---------|---------------------|---------------------|
|         | Concentration (ppm) | Concentration (ppm) |
| Cu      | 346.293             | 357.56              |
| Ni      | 58.31               | 85.32               |
| Pt      | 5.765               | 0.534               |
| Au      | 1.585               | 2.235               |
| Zn      | 1.552               | 1.832               |

**Table S5** Critical values for  $\text{AuCl}_4^-$  adsorption process in DFT calculations.

| Au     | System Charge | Spin Multiplicity | HOMO (a.u.) | LUMO (a.u.) | HOMO-LUMO gap (kcal/mol) | Hardness (kcal/mol) | Chemical potential | Electron-negativity |
|--------|---------------|-------------------|-------------|-------------|--------------------------|---------------------|--------------------|---------------------|
| Step 1 | 2             | 1                 | -0.25949    | -0.15641    | 64.684                   | 64.684              | -130.491           | 130.491             |
| Step 2 | 0             | 1                 | -0.13501    | -0.08743    | 29.857                   | 29.857              | -69.792            | 69.792              |
| Step 3 | 1             | 2                 |             |             |                          | 105.778             | -111.837           | 111.837             |
| Step 4 | 0             | 2                 |             |             |                          | 82.787              | -81.425            | 81.425              |

**Table S6** Critical values for  $\text{PtCl}_4^{2-}$  adsorption process in DFT calculations.

| Pt            | System<br>Charge | Spin<br>Multiplicity | HOMO<br>(a.u.) | LUMO<br>(a.u.) | HOMO-<br>LUMO<br>gap<br>(kcal/mol) | Hardness<br>(kcal/mol) | Chemical<br>potential | Electron-<br>negativity |
|---------------|------------------|----------------------|----------------|----------------|------------------------------------|------------------------|-----------------------|-------------------------|
| <i>Step 1</i> | 1                | 1                    | -0.25419       | -0.18324       | 44.522                             | 44.522                 | -137.246              | 137.246                 |
| <i>Step 2</i> | 1                | 1                    | -0.28214       | -0.19021       | 57.687                             | 57.687                 | -148.202              | 148.202                 |
| <i>Step 3</i> | 1                | 1                    | -0.21067       | -0.18662       | 15.092                             | 15.092                 | -124.652              | 124.652                 |
| <i>Step 4</i> | -1               | 1                    | -0.03108       | -0.01902       | 7.568                              | 7.568                  | -15.719               | 15.719                  |

**Table S7.** The energy values of each model unit during the whole  $\text{AuCl}_4^-$  adsorption process.

| Model unit                                                                          | Charge | Spin | E-A.U.<br>(No Solvent) | E-A.U.<br>(Solvent: water) |
|-------------------------------------------------------------------------------------|--------|------|------------------------|----------------------------|
|  | -1     | 1    | -1976.82               | -1976.89                   |
|  | 0      | 1    | -460.83                | -460.84                    |
|  | 1      | 1    | -76.73                 | -76.89                     |
|  | 0      | 1    | -76.46                 | -76.47                     |
|  | 3      | 1    | -1594.84               | -1595.30                   |
|  | 2      | 1    | -3571.96               | -3572.20                   |
|  | 0      | 1    | -2650.69               | -2650.77                   |
|  | 1      | 2    | -1730.02               | -1730.10                   |
|  | 0      | 2    | -3706.92               | -3707.02                   |

**Table S8.** The energy difference of  $\text{AuCl}_4^-$  adsorption process before/after solvent effect.

|                | $\Delta E1$ (eV) | $\Delta E2$ (eV) | $\Delta E3$ (eV) | $\Delta E4$ (eV) |
|----------------|------------------|------------------|------------------|------------------|
| No Solvent     | -8.16            | -10.61           | -12.25           | -2.18            |
| Solvent Effect | -0.27            | -6.80            | -4.63            | -0.82            |

**Table S9.** The energy values of each model unit during the whole  $\text{PtCl}_4^{2-}$  adsorption process.

| Model unit                                                                          | Charge | Spin | E-A.U.<br>(No Solvent) | E-A.U.<br>(Solvent: water) |
|-------------------------------------------------------------------------------------|--------|------|------------------------|----------------------------|
|    | -2     | 1    | -1960.44               | -1960.72                   |
|   | 0      | 1    | -460.83                | -460.84                    |
|  | 1      | 1    | -76.73                 | -76.89                     |
|  | 0      | 1    | -76.46                 | -76.47                     |
|  | 3      | 1    | -1594.84               | -1595.30                   |
|  | 1      | 1    | -3555.90               | -3556.12                   |
|  | 1      | 1    | -2634.22               | -2634.32                   |

**Table S10.** The energy difference of  $\text{PtCl}_4^{2-}$  adsorption process before/after solvent effect.

|                | $\Delta E1$ (eV) | $\Delta E2$ (eV) |
|----------------|------------------|------------------|
| No Solvent     | -16.87           | 0.54             |
| Solvent Effect | -2.72            | 3.27             |

**Table S11.** Eco-inventories used in LCI for 1 kg 1-vinyl-1,2,4-triazole production (The substance was synthesized by a chemical formula).

| Input                                           | Amount | Units | Corresponding LCI                             |
|-------------------------------------------------|--------|-------|-----------------------------------------------|
| <i>Synthesis of 1 kg 1-vinyl-1,2,4-triazole</i> |        |       |                                               |
| Cyclic N-compound                               | 0.7263 | kg    | Cyclic N-compound {GLO}  market for   APOS, U |
| Vinyl acetate                                   | 0.9052 | kg    | Vinyl acetate {GLO}  market for   APOS, U     |

**Table S12.** Eco-inventories used in LCI for 1 kg bromoacetonitrile production (The substance was synthesized by a chemical formula).

| Input                                      | Amount | Units | Corresponding LCI                                           |
|--------------------------------------------|--------|-------|-------------------------------------------------------------|
| <i>Synthesis of 1 kg bromoacetonitrile</i> |        |       |                                                             |
| Acetonitrile                               | 0.3534 | kg    | Acetonitrile {GLO}  market for   APOS, U                    |
| Acetone                                    | 1.7668 | kg    | Acetone, liquid {RoW}  market for acetone, liquid   APOS, U |

**Table S13.** Eco-inventories used in LCI for 1 kg LiTFSI production (The substance was synthesized by a chemical formula).

| Input                            | Amount | Units | Corresponding LCI                                   |
|----------------------------------|--------|-------|-----------------------------------------------------|
| <i>Synthesis of 1 kg LiTFSI</i>  |        |       |                                                     |
| Trifluoromethane                 | 0.2439 | kg    | Trifluoromethane {GLO}  market for   APOS, U        |
| Lithium brine                    | 0.0765 | kg    | Lithium brine, 6.7 % Li {GLO}  market for   APOS, U |
| lithium bis(fluorosulfonyl) imid | 0.6516 | kg    | Chemical, organic {GLO}  market for   APOS, U       |

**Table S14.** Eco-inventories used in LCI for 1 g Ptri az-CN-A production in **Scale-1** (supercritical CO<sub>2</sub> drying was chosen as drying method).

| Input                           | Amount     | Units/<br>FU | Corresponding LCI                                          |
|---------------------------------|------------|--------------|------------------------------------------------------------|
| <i>Synthesis of TriazoleBr</i>  |            |              |                                                            |
| 1-vinyl-1,2,4-triazole          | 0.5124     | g            | /                                                          |
| bromoacetonitrile               | 0.9698     | g            | /                                                          |
| BHT                             | 4.6581E-03 | g            | Chemical, organic {GLO}  market for   APOS, U              |
| Electricity (for IKA RCT basic) | 4.0246     | kWh          | Electricity, low voltage {GLO}  market group for   APOS, U |
| <i>Synthesis of Ptri azBr</i>   |            |              |                                                            |
| AIBN                            | 0.01258    | g            | Chemical, organic {GLO}  market for   APOS, U              |

|                                                           |            |     |                                                                                                                                                           |
|-----------------------------------------------------------|------------|-----|-----------------------------------------------------------------------------------------------------------------------------------------------------------|
| DMSO                                                      | 10.2478    | g   | Dimethyl sulfoxide {GLO}  market for   APOS, U                                                                                                            |
| Electricity (for Edwards Pump)                            | 0.0210     | kWh | Electricity, low voltage {GLO}  market group for   APOS, U                                                                                                |
| Electricity (for IKA RCT basic)                           | 0.8944     | kWh | Electricity, low voltage {GLO}  market group for   APOS, U                                                                                                |
| <b>Synthesis of Ptrialz-CN</b>                            |            |     |                                                                                                                                                           |
| LiTFSI                                                    | 1.4114     | g   |                                                                                                                                                           |
| Water                                                     | 46.5810    | g   | Water, deionised {RoW}  market for water, deionised   APOS, U                                                                                             |
| Electricity (for Stirrer)                                 | 4.4718E-03 | kWh | Electricity, low voltage {GLO}  market group for   APOS, U                                                                                                |
| <b>TIPS Process</b>                                       |            |     |                                                                                                                                                           |
| EtoH                                                      | 2.2333     | g   | Ethanol, without water, in 99.7% solution state, from ethylene {RoW}  market for ethanol, without water, in 99.7% solution state, from ethylene   APOS, U |
| DMF                                                       | 13.1167    | g   | N,N-dimethylformamide {GLO}  market for   APOS, U                                                                                                         |
| Electricity (for Experiment Oven)                         | 0.1975     | kWh | Electricity, low voltage {GLO}  market group for   APOS, U                                                                                                |
| <b>Crosslink &amp; Solvent Change Process</b>             |            |     |                                                                                                                                                           |
| NH <sub>3</sub>                                           | 1.9822     | g   | Ammonia, anhydrous, liquid {RoW}  market for ammonia, anhydrous, liquid   APOS, U                                                                         |
| EtOH                                                      | 394.4622   | g   | Ethanol, without water, in 99.7% solution state, from ethylene {RoW}  market for ethanol, without water, in 99.7% solution state, from ethylene   APOS, U |
| <b>Drying Process-Supercritical CO<sub>2</sub> Drying</b> |            |     |                                                                                                                                                           |
| Electricity (for instrument)                              | 4.0000     | kWh | Electricity, low voltage {GLO}  market group for   APOS, U                                                                                                |
| CO <sub>2</sub>                                           | 275.0037   | g   | Carbon dioxide, liquid {RoW}  market for   APOS, U                                                                                                        |

**Table S15.** Eco-inventories used in LCI for 1 g Ptrialz-CN-A production in **Scale-2** (freeze-drying was chosen as drying method).

| Input                          | Amount     | Units/FU | Eco-inventory from Ecoinvent v3.8 database    |
|--------------------------------|------------|----------|-----------------------------------------------|
| <b>Synthesis of TriazoleBr</b> |            |          |                                               |
| 1-vinyl-1,2,4-triazole         | 0.5059     | g        | /                                             |
| bromoacetonitrile              | 0.9562     | g        | /                                             |
| BHT                            | 4.6747E-03 | g        | Chemical, organic {GLO}  market for   APOS, U |

|                                               |            |     |                                                                                                                                                           |
|-----------------------------------------------|------------|-----|-----------------------------------------------------------------------------------------------------------------------------------------------------------|
| Electricity (for IKA RCT basic)               | 0.2186     | kWh | Electricity, low voltage {GLO}  market group for   APOS, U                                                                                                |
| <b>Synthesis of PtrizBr</b>                   |            |     |                                                                                                                                                           |
| AIBN                                          | 0.0124     | g   | Chemical, organic {GLO}  market for   APOS, U                                                                                                             |
| DMSO                                          | 12.0763    | g   | Dimethyl sulfoxide {GLO}  market for   APOS, U                                                                                                            |
| Electricity (for Edwards Pump)                | 1.1383E-03 | kWh | Electricity, low voltage {GLO}  market group for   APOS, U                                                                                                |
| Electricity (for IKA RCT basic)               | 0.04857    | kWh | Electricity, low voltage {GLO}  market group for   APOS, U                                                                                                |
| <b>Synthesis of Ptriz-CN</b>                  |            |     |                                                                                                                                                           |
| LiTFSI                                        | 1.4113     | g   |                                                                                                                                                           |
| Water                                         | 11.4490    | g   | Water, deionised {RoW}  market for water, deionised   APOS, U                                                                                             |
| Electricity (for Stirrer)                     | 2.4284E-04 | kWh | Electricity, low voltage {GLO}  market group for   APOS, U                                                                                                |
| <b>TIPS Process</b>                           |            |     |                                                                                                                                                           |
| EtOH                                          | 2.2363     | g   | Ethanol, without water, in 99.7% solution state, from ethylene {RoW}  market for ethanol, without water, in 99.7% solution state, from ethylene   APOS, U |
| DMF                                           | 13.1235    | g   | N, N-dimethylformamide {GLO}  market for   APOS, U                                                                                                        |
| Electricity (for Experiment Oven)             | 0.01073    | kWh | Electricity, low voltage {GLO}  market group for   APOS, U                                                                                                |
| <b>Crosslink &amp; Solvent Change Process</b> |            |     |                                                                                                                                                           |
| NH <sub>3</sub>                               | 0.1208     | g   | Ammonia, anhydrous, liquid {RoW}  market for ammonia, anhydrous, liquid   APOS, U                                                                         |
| EtOH                                          | 23.9483    | g   | Ethanol, without water, in 99.7% solution state, from ethylene {RoW}  market for ethanol, without water, in 99.7% solution state, from ethylene   APOS, U |
| <b>Drying Process-Freezing Drying</b>         |            |     |                                                                                                                                                           |
| Electricity (for Freeze Dryer)                | 0.1336     | kWh | Electricity, low voltage {GLO}  market group for   APOS, U                                                                                                |
| Electricity (for Pump)                        | 0.04493    | kWh | Electricity, low voltage {GLO}  market group for   APOS, U                                                                                                |

**Table S16** Environmental impacts at each stage of Ptri az-CN-A production in Scale-1.

| Impact category | Unit                  | Total Scale-1 | Synthesis Stage-1 | Synthesis Stage-2 | Synthesis Stage-3 | TIPS Process | Crosslink & Solvent exchange | Drying Process |
|-----------------|-----------------------|---------------|-------------------|-------------------|-------------------|--------------|------------------------------|----------------|
| <b>OD</b>       | kg CFC-11 eq          | 7.71E-07      | 1.29E-07          | 3.12E-08          | 4.47E-07          | 1.37E-08     | 1.78E-08                     | 1.33E-07       |
| <b>GW</b>       | kg CO <sub>2</sub> eq | 7.503232      | 2.86E+00          | 6.62E-01          | 7.53E-03          | 1.82E-01     | 7.27E-01                     | 3.06E+00       |
| <b>SM</b>       | kg O <sub>3</sub> eq  | 0.443254      | 1.58E-01          | 3.66E-02          | 3.57E-04          | 9.94E-03     | 4.87E-02                     | 1.89E-01       |
| <b>AC</b>       | kg SO <sub>2</sub> eq | 0.033973      | 1.28E-02          | 3.01E-03          | 3.46E-05          | 8.10E-04     | 3.90E-03                     | 1.34E-02       |
| <b>ET</b>       | kg N eq               | 0.02886       | 1.10E-02          | 2.52E-03          | 2.21E-05          | 7.97E-04     | 3.13E-03                     | 1.14E-02       |
| <b>HHC</b>      | CTUh                  | 5.06E-07      | 1.87E-07          | 4.36E-08          | 5.31E-10          | 1.22E-08     | 6.02E-08                     | 2.02E-07       |
| <b>HHNC</b>     | CTUh                  | 1.75E-06      | 6.71E-07          | 1.55E-07          | 2.35E-09          | 4.17E-08     | 1.62E-07                     | 7.18E-07       |
| <b>RE</b>       | kg PM2.5 eq           | 0.010166      | 4.25E-03          | 9.77E-04          | 7.50E-06          | 2.37E-04     | 2.95E-04                     | 4.40E-03       |
| <b>EC</b>       | CTUe                  | 138.4661      | 5.57E+01          | 1.28E+01          | 1.51E-01          | 3.26E+00     | 7.77E+00                     | 5.87E+01       |
| <b>FF</b>       | MJ surplus            | 7.688747      | 2.22E+00          | 5.60E-01          | 1.27E-02          | 2.42E-01     | 2.30E+00                     | 2.36E+00       |

**Table S17** Environmental impacts of each substance in Synthesis Stage-1 (Scale-1).

| Impact category | Unit                  | Synthesis Stage-1 | 1-vinyl-1,2,4-triazole | bromoaceto nitrile | BHT      | Electricity (heating) |
|-----------------|-----------------------|-------------------|------------------------|--------------------|----------|-----------------------|
| <b>OD</b>       | kg CFC-11 eq          | 1.29E-07          | 4.50E-09               | 1.49E-10           | 9.07E-13 | 1.24E-07              |
| <b>GW</b>       | kg CO <sub>2</sub> eq | 2.86E+00          | 0.006643               | 0.005868           | 9.04E-06 | 2.851961              |
| <b>SM</b>       | kg O <sub>3</sub> eq  | 1.58E-01          | 0.00036                | 0.000301           | 4.52E-07 | 0.15773               |
| <b>AC</b>       | kg SO <sub>2</sub> eq | 1.28E-02          | 3.05E-05               | 2.63E-05           | 3.58E-08 | 0.012769              |
| <b>ET</b>       | kg N eq               | 1.10E-02          | 3.90E-05               | 1.55E-05           | 1.64E-08 | 0.010946              |
| <b>HHC</b>      | CTUh                  | 1.87E-07          | 4.75E-10               | 2.49E-10           | 4.90E-13 | 1.87E-07              |
| <b>HHNC</b>     | CTUh                  | 6.71E-07          | 1.64E-09               | 6.91E-10           | 1.31E-12 | 6.69E-07              |
| <b>RE</b>       | kg PM2.5 eq           | 4.25E-03          | 5.90E-06               | 2.66E-06           | 5.33E-09 | 0.004244159           |
| <b>EC</b>       | CTUe                  | 5.57E+01          | 0.170061               | 0.041708           | 7.73E-05 | 55.5021               |
| <b>FF</b>       | MJ surplus            | 2.22E+00          | 0.011605               | 0.020419           | 3.69E-05 | 2.183006              |



**Table S18** Environmental impacts of each substance in Synthesis Stage-2 (Scale-1).

| Impact category | Unit                  | Synthesis Stage-2 | AIBN     | DMSO     | Electricity (pump) | Electricity (heating) |
|-----------------|-----------------------|-------------------|----------|----------|--------------------|-----------------------|
| <i>OD</i>       | kg CFC-11 eq          | 3.12E-08          | 2.45E-12 | 2.88E-09 | 6.48E-10           | 2.76E-08              |
| <i>GW</i>       | kg CO <sub>2</sub> eq | 6.62E-01          | 2.44E-05 | 0.013348 | 0.014854           | 0.633769              |
| <i>SM</i>       | kg O <sub>3</sub> eq  | 3.66E-02          | 1.22E-06 | 0.000753 | 0.000822           | 0.035051              |
| <i>AC</i>       | kg SO <sub>2</sub> eq | 3.01E-03          | 9.66E-08 | 0.000104 | 6.65E-05           | 0.002838              |
| <i>ET</i>       | kg N eq               | 2.52E-03          | 4.42E-08 | 3.53E-05 | 5.70E-05           | 0.002432              |
| <i>HHC</i>      | CTUh                  | 4.36E-08          | 1.32E-12 | 1.14E-09 | 9.71E-10           | 4.14E-08              |
| <i>HHNC</i>     | CTUh                  | 1.55E-07          | 3.53E-12 | 3.26E-09 | 3.48E-09           | 1.49E-07              |
| <i>RE</i>       | kg PM2.5 eq           | 9.77E-04          | 1.44E-08 | 1.19E-05 | 2.21E-05           | 0.000943              |
| <i>EC</i>       | CTUe                  | 1.28E+01          | 0.000209 | 0.222544 | 0.289073           | 12.333801             |
| <i>FF</i>       | MJ surplus            | 5.60E-01          | 9.96E-05 | 0.063376 | 0.011369824        | 0.4851125             |

**Table S19** Environmental impacts of each substance in Synthesis Stage-3 (Scale-1).

| Impact category | Unit                  | Synthesis Stage-3 | LiTFSI   | Water    | Electricity (Stirrer) |
|-----------------|-----------------------|-------------------|----------|----------|-----------------------|
| <i>OD</i>       | kg CFC-11 eq          | 4.47E-07          | 4.46E-07 | 7.73E-12 | 1.38E-10              |
| <i>GW</i>       | kg CO <sub>2</sub> eq | 7.53E-03          | 0.004348 | 1.41E-05 | 0.003169              |
| <i>SM</i>       | kg O <sub>3</sub> eq  | 3.57E-04          | 0.000181 | 8.66E-07 | 0.000175              |
| <i>AC</i>       | kg SO <sub>2</sub> eq | 3.46E-05          | 2.03E-05 | 1.05E-07 | 1.42E-05              |
| <i>ET</i>       | kg N eq               | 2.21E-05          | 9.91E-06 | 5.38E-08 | 1.22E-05              |
| <i>HHC</i>      | CTUh                  | 5.31E-10          | 3.21E-10 | 2.64E-12 | 2.07E-10              |
| <i>HHNC</i>     | CTUh                  | 2.35E-09          | 1.60E-09 | 1.11E-11 | 7.43E-10              |
| <i>RE</i>       | kg PM2.5 eq           | 7.50E-06          | 2.76E-06 | 1.84E-08 | 4.72E-06              |
| <i>EC</i>       | CTUe                  | 1.51E-01          | 0.088321 | 0.000678 | 0.061669              |
| <i>FF</i>       | MJ surplus            | 1.27E-02          | 0.010286 | 1.62E-05 | 0.002426              |

**Table S20** Environmental impacts of each substance in TIPS process (Scale-1).

| Impact category | Unit               | TIPS process | EtOH      | DMF       | Electricity (heating) |
|-----------------|--------------------|--------------|-----------|-----------|-----------------------|
| <b>OD</b>       | kg                 |              |           |           |                       |
|                 | CFC                | 1.37E-08     | 9.95E-11  | 7.51E-09  | 6.10E-09              |
|                 | -11 eq             |              |           |           |                       |
| <b>GW</b>       | kg                 | 1.82E-01     | 0.0040798 | 0.0382044 | 0.1399574             |
|                 | CO <sub>2</sub> eq |              |           |           |                       |
| <b>SM</b>       | kg O <sub>3</sub>  | 9.94E-03     | 0.0002743 | 0.0019203 | 0.0077405             |
|                 | eq                 |              |           |           |                       |
| <b>AC</b>       | kg                 | 8.10E-04     | 2.20E-05  | 0.0001615 | 0.0006266             |
|                 | SO <sub>2</sub> eq |              |           |           |                       |
| <b>ET</b>       | kg N               | 7.97E-04     | 1.76E-05  | 0.0002424 | 0.0005372             |
|                 | eq                 |              |           |           |                       |
| <b>HHC</b>      | CTUh               | 1.22E-08     | 3.39E-10  | 2.66E-09  | 9.15E-09              |
| <b>HHNC</b>     | CTUh               | 4.17E-08     | 9.10E-10  | 8.00E-09  | 3.28E-08              |
| <b>RE</b>       | kg                 |              | 1.66E-06  | 2.68E-05  | 0.0002083             |
|                 | PM2.5              | 2.37E-04     |           |           |                       |
|                 | eq                 |              |           |           |                       |
| <b>EC</b>       | CTUe               | 3.26E+00     | 0.0437756 | 0.488294  | 2.723714              |
| <b>FF</b>       | MJ                 | 2.42E-01     | 0.0129843 | 0.122344  | 0.107129              |
|                 | surplus            |              |           |           |                       |

**Table S21** Environmental impacts of each substance in Crosslink & Solvent exchange process (Scale-1).

| Impact category | Unit               | Crosslink & Solvent exchange | Ammonia    | EtOH      |
|-----------------|--------------------|------------------------------|------------|-----------|
| <b>OD</b>       | kg                 |                              |            |           |
|                 | CFC                | 1.78E-08                     | 1.73E-10   | 1.76E-08  |
|                 | -11 eq             |                              |            |           |
| <b>GW</b>       | kg                 | 7.27E-01                     | 0.0064504  | 0.720594  |
|                 | CO <sub>2</sub> eq |                              |            |           |
| <b>SM</b>       | kg O <sub>3</sub>  | 4.87E-02                     | 0.00020734 | 0.0484475 |
|                 | eq                 |                              |            |           |
| <b>AC</b>       | kg                 | 3.90E-03                     | 1.70E-05   | 0.0038782 |
|                 | SO <sub>2</sub> eq |                              |            |           |
| <b>ET</b>       | kg N               | 3.13E-03                     | 1.19E-05   | 0.0031167 |
|                 | eq                 |                              |            |           |
| <b>HHC</b>      | CTUh               | 6.02E-08                     | 2.94E-10   | 5.99E-08  |
| <b>HHNC</b>     | CTUh               | 1.62E-07                     | 8.85E-10   | 1.61E-07  |
| <b>RE</b>       | kg                 |                              | 1.83E-06   | 0.0002929 |
|                 | PM2.5              | 2.95E-04                     |            |           |
|                 | eq                 |                              |            |           |
| <b>EC</b>       | CTUe               | 7.77E+00                     | 0.0411422  | 7.731867  |
| <b>FF</b>       | MJ                 | 2.30E+00                     | 0.0083758  | 2.293353  |
|                 | surplus            |                              |            |           |

**Table S22** Environmental impacts of each substance in Supercritical CO<sub>2</sub> drying process (Scale-1).

| Impact category | Unit               | Supercritical CO <sub>2</sub> drying | Electricity (for instrument) | CO <sub>2</sub> |
|-----------------|--------------------|--------------------------------------|------------------------------|-----------------|
| <b>OD</b>       | kg                 |                                      |                              |                 |
|                 | CFC                | 1.33E-07                             | 1.24E-07                     | 8.99E-09        |
|                 | -11 eq             |                                      |                              |                 |
| <b>GW</b>       | kg                 | 3.06E+00                             | 2.834533                     | 0.225404        |
|                 | CO <sub>2</sub> eq |                                      |                              |                 |
| <b>SM</b>       | kg O <sub>3</sub>  | 1.89E-01                             | 0.156766                     | 0.0325217       |
|                 | eq                 |                                      |                              |                 |
| <b>AC</b>       | kg                 | 1.34E-02                             | 0.0126911                    | 0.0007082       |
|                 | SO <sub>2</sub> eq |                                      |                              |                 |
| <b>ET</b>       | kg N               | 1.14E-02                             | 0.0108791                    | 0.0005081       |
|                 | eq                 |                                      |                              |                 |
| <b>HHC</b>      | CTUh               | 2.02E-07                             | 1.85E-07                     | 1.66E-08        |
| <b>HHNC</b>     | CTUh               | 7.18E-07                             | 6.65E-07                     | 5.30E-08        |
| <b>RE</b>       | kg                 |                                      | 0.004218                     | 0.0001784       |
|                 | PM2.5              | 4.40E-03                             |                              |                 |
|                 | eq                 |                                      |                              |                 |
| <b>EC</b>       | CTUe               | 5.87E+01                             | 55.162925                    | 3.564127        |
| <b>FF</b>       | MJ                 | 2.36E+00                             | 2.169666                     | 0.187144        |
|                 | surplus            |                                      |                              |                 |

**Table S23** Environmental impacts at each stage of Ptriaz-CN-A production in Scale-2.

| Impact category | Unit               | Total Scale-2 | Synthesis Stage-1 | Synthesis Stage-2 | Synthesis Stage-3 | TIPS Process | Crosslink & Solvent exchange | Drying Process |
|-----------------|--------------------|---------------|-------------------|-------------------|-------------------|--------------|------------------------------|----------------|
| <b>OD</b>       | kg                 | 4.77E-07      | 1.13E-08          | 4.94E-09          | 4.46E-07          | 7.95E-09     | 1.08E-09                     | 5.51E-09       |
|                 | CFC                |               |                   |                   |                   |              |                              |                |
|                 | -11 eq             |               |                   |                   |                   |              |                              |                |
| <b>GW</b>       | kg                 | 0.443264      | 0.167231          | 5.10E-02          | 4.52E-03          | 4.99E-02     | 4.41E-02                     | 1.26E-01       |
|                 | CO <sub>2</sub> eq |               |                   |                   |                   |              |                              |                |
| <b>SM</b>       | kg O <sub>3</sub>  | 0.024811      | 0.009218          | 2.84E-03          | 1.91E-04          | 2.62E-03     | 2.95E-03                     | 7.00E-03       |
|                 | eq                 |               |                   |                   |                   |              |                              |                |
| <b>AC</b>       | kg                 | 0.002071      | 7.50E-04          | 2.80E-04          | 2.11E-05          | 2.18E-04     | 2.36E-04                     | 5.66E-04       |
|                 | SO <sub>2</sub> eq |               |                   |                   |                   |              |                              |                |
| <b>ET</b>       | kg N               | 0.001800      | 6.48E-04          | 1.77E-04          | 1.06E-05          | 2.89E-04     | 1.90E-04                     | 4.85E-04       |
|                 | eq                 |               |                   |                   |                   |              |                              |                |
| <b>HHC</b>      | CTUh               | 3.03E-08      | 1.08E-08          | 3.65E-09          | 3.33E-10          | 3.50E-09     | 3.66E-09                     | 8.27E-09       |
| <b>HHNC</b>     | CTUh               | 1.03E-07      | 3.86E-08          | 1.21E-08          | 1.64E-09          | 1.07E-08     | 9.81E-09                     | 2.97E-08       |
| <b>RE</b>       | kg                 | 0.000554      | 2.39E-04          | 6.65E-05          | 3.02E-06          | 3.98E-05     | 1.79E-05                     | 1.88E-04       |
|                 | PM2.5              |               |                   |                   |                   |              |                              |                |
|                 | eq                 |               |                   |                   |                   |              |                              |                |
| <b>EC</b>       | CTUe               | 7.876643      | 3.22E+00          | 9.48E-01          | 9.18E-02          | 6.80E-01     | 4.72E-01                     | 2.46E+00       |
| <b>FF</b>       | MJ                 | 0.640123      | 1.50E-01          | 1.02E-01          | 1.04E-02          | 1.41E-01     | 1.40E-01                     | 9.68E-02       |
|                 | surplus            |               |                   |                   |                   |              |                              |                |

**Table S24** Environmental impacts of each substance in Synthesis Stage-1 (Scale-2).

| Impact category | Unit               | Synthesis Stage-1 | 1-vinyl-1,2,4-triazole | bromoaceto nitrile | BHT      | Electricity (heating) |
|-----------------|--------------------|-------------------|------------------------|--------------------|----------|-----------------------|
| <b>OD</b>       | kg                 | 1.13E-08          |                        |                    |          |                       |
|                 | CFC                |                   | 4.44E-09               | 1.47E-10           | 9.10E-13 | 6.75E-09              |
|                 | -11 eq             |                   |                        |                    |          |                       |
| <b>GW</b>       | kg                 | 0.167231          | 0.006559               | 0.005786           | 9.07E-06 | 0.154877              |
|                 | CO <sub>2</sub> eq |                   |                        |                    |          |                       |
| <b>SM</b>       | kg O <sub>3</sub>  | 0.009218          | 0.000356               | 0.000296           | 4.53E-07 | 0.008566              |
|                 | eq                 |                   |                        |                    |          |                       |
| <b>AC</b>       | kg                 | 7.50E-04          | 3.01E-05               | 2.60E-05           | 3.59E-08 | 0.000693              |
|                 | SO <sub>2</sub> eq |                   |                        |                    |          |                       |
| <b>ET</b>       | kg N               | 6.48E-04          | 3.85E-05               | 1.53E-05           | 1.64E-08 | 0.000594              |
|                 | eq                 |                   |                        |                    |          |                       |
| <b>HHC</b>      | CTUh               | 1.08E-08          | 4.69E-10               | 2.45E-10           | 4.92E-13 | 1.01E-08              |
| <b>HHNC</b>     | CTUh               | 3.86E-08          | 1.62E-09               | 6.81E-10           | 1.31E-12 | 3.63E-08              |
| <b>RE</b>       | kg                 | 2.39E-04          | 5.83E-06               | 2.62E-06           | 5.35E-09 | 0.0002304             |
|                 | PM2.5              |                   |                        |                    |          |                       |
|                 | eq                 |                   |                        |                    |          |                       |
| <b>EC</b>       | CTUe               | 3.22E+00          | 0.167913               | 0.041122           | 7.76E-05 | 3.014063              |
| <b>FF</b>       | MJ                 | 1.50E-01          | 0.011458               | 0.020132           | 3.70E-05 | 0.118549              |
|                 | surplus            |                   |                        |                    |          |                       |

**Table S25** Environmental impacts of each substance in Synthesis Stage-2 (Scale-2).

| Impact category | Unit               | Synthesis Stage-2 | AIBN     | DMSO     | Electricity (pump) | Electricity (heating) |
|-----------------|--------------------|-------------------|----------|----------|--------------------|-----------------------|
| <b>OD</b>       | kg                 | 4.94E-09          |          |          |                    |                       |
|                 | CFC                |                   | 2.41E-12 | 3.40E-09 | 3.52E-11           | 1.50E-09              |
|                 | -11 eq             |                   |          |          |                    |                       |
| <b>GW</b>       | kg                 | 5.10E-02          | 2.41E-05 | 0.015729 | 0.000807           | 0.034417              |
|                 | CO <sub>2</sub> eq |                   |          |          |                    |                       |
| <b>SM</b>       | kg O <sub>3</sub>  | 2.84E-03          | 1.20E-06 | 0.000887 | 4.46E-05           | 0.001903              |
|                 | eq                 |                   |          |          |                    |                       |
| <b>AC</b>       | kg                 | 2.80E-04          | 9.52E-08 | 0.000122 | 3.61E-06           | 0.000154              |
|                 | SO <sub>2</sub> eq |                   |          |          |                    |                       |
| <b>ET</b>       | kg N               | 1.77E-04          | 4.36E-08 | 4.16E-05 | 3.10E-06           | 0.000132              |
|                 | eq                 |                   |          |          |                    |                       |
| <b>HHC</b>      | CTUh               | 3.65E-09          | 1.30E-12 | 1.35E-09 | 5.28E-11           | 2.25E-09              |
| <b>HHNC</b>     | CTUh               | 1.21E-08          | 3.47E-12 | 3.84E-09 | 1.89E-10           | 8.07E-09              |
| <b>RE</b>       | kg                 | 6.65E-05          | 1.42E-08 | 1.41E-05 | 1.20E-06           | 5.12E-05              |
|                 | PM2.5              |                   |          |          |                    |                       |
|                 | eq                 |                   |          |          |                    |                       |
| <b>EC</b>       | CTUe               | 9.48E-01          | 0.000206 | 0.262252 | 0.015698           | 0.669792              |
| <b>FF</b>       | MJ                 | 1.02E-01          | 9.81E-05 | 0.074683 | 0.000617           | 0.026344              |
|                 | surplus            |                   |          |          |                    |                       |

**Table S26** Environmental impacts of each substance in Synthesis Stage-3 (Scale-2).

| Impact category | Unit               | Synthesis Stage-3 | LiTFSI   | Water    | Electricity (Stirrer) |
|-----------------|--------------------|-------------------|----------|----------|-----------------------|
| <i>OD</i>       | kg                 | 4.46E-07          | 4.46E-07 | 1.90E-12 | 7.50E-12              |
|                 | CFC                |                   |          |          |                       |
|                 | -11 eq             |                   |          |          |                       |
| <i>GW</i>       | kg                 | 4.52E-03          | 0.004348 | 3.47E-06 | 0.000172              |
|                 | CO <sub>2</sub> eq |                   |          |          |                       |
| <i>SM</i>       | kg O <sub>3</sub>  | 1.91E-04          | 0.000181 | 2.13E-07 | 9.52E-06              |
|                 | eq                 |                   |          |          |                       |
| <i>AC</i>       | kg                 | 2.11E-05          | 2.03E-05 | 2.59E-08 | 7.70E-07              |
|                 | SO <sub>2</sub> eq |                   |          |          |                       |
| <i>ET</i>       | kg N               | 1.06E-05          | 9.91E-06 | 1.32E-08 | 6.60E-07              |
|                 | eq                 |                   |          |          |                       |
| <i>HHC</i>      | CTUh               | 3.33E-10          | 3.21E-10 | 6.49E-13 | 1.13E-11              |
| <i>HHNC</i>     | CTUh               | 1.64E-09          | 1.60E-09 | 2.72E-12 | 4.04E-11              |
| <i>RE</i>       | kg                 | 3.02E-06          | 2.76E-06 | 4.53E-09 | 2.56E-07              |
|                 | PM2.5              |                   |          |          |                       |
| <i>EC</i>       | eq                 | 9.18E-02          | 0.088315 | 0.000167 | 0.003349              |
|                 | CTUe               |                   |          |          |                       |
| <i>FF</i>       | MJ                 | 1.04E-02          | 0.010285 | 3.99E-06 | 0.000132              |
|                 | surplus            |                   |          |          |                       |

**Table S27** Environmental impacts of each substance in TIPS process (Scale-2).

| Impact category | Unit               | TIPS process | EtOH     | DMF      | Electricity (heating) |
|-----------------|--------------------|--------------|----------|----------|-----------------------|
| <i>OD</i>       | kg                 | 7.95E-09     | 9.97E-11 | 7.52E-09 | 3.31E-10              |
|                 | CFC                |              |          |          |                       |
|                 | -11 eq             |              |          |          |                       |
| <i>GW</i>       | kg                 | 4.99E-02     | 0.004085 | 0.038224 | 0.0076                |
|                 | CO <sub>2</sub> eq |              |          |          |                       |
| <i>SM</i>       | kg O <sub>3</sub>  | 2.62E-03     | 0.000275 | 0.001921 | 0.00042               |
|                 | eq                 |              |          |          |                       |
| <i>AC</i>       | kg                 | 2.18E-04     | 2.20E-05 | 0.000162 | 3.40E-05              |
|                 | SO <sub>2</sub> eq |              |          |          |                       |
| <i>ET</i>       | kg N               | 2.89E-04     | 1.77E-05 | 0.000242 | 2.92E-05              |
|                 | eq                 |              |          |          |                       |
| <i>HHC</i>      | CTUh               | 3.50E-09     | 3.40E-10 | 2.66E-09 | 4.97E-10              |
| <i>HHNC</i>     | CTUh               | 1.07E-08     | 9.11E-10 | 8.00E-09 | 1.78E-09              |
| <i>RE</i>       | kg                 | 3.98E-05     | 1.66E-06 | 2.68E-05 | 1.13E-05              |
|                 | PM2.5              |              |          |          |                       |
|                 | eq                 |              |          |          |                       |
| <i>EC</i>       | CTUe               | 6.80E-01     | 0.043834 | 0.48855  | 0.147912              |
| <i>FF</i>       | MJ                 | 1.41E-01     | 0.013002 | 0.122408 | 0.005818              |
|                 | surplus            |              |          |          |                       |

**Table S28** Environmental impacts of each substance in Crosslink & Solvent exchange process (Scale-2).

| Impact category | Unit               | Crosslink & Solvent exchange | Ammonia  | EtOH     |
|-----------------|--------------------|------------------------------|----------|----------|
| <i>OD</i>       | kg                 | 1.08E-09                     |          |          |
|                 | CFC                |                              | 1.05E-11 | 1.07E-09 |
|                 | -11 eq             |                              |          |          |
| <i>GW</i>       | kg                 | 4.41E-02                     | 0.000392 | 0.043748 |
|                 | CO <sub>2</sub> eq |                              |          |          |
| <i>SM</i>       | kg O <sub>3</sub>  | 2.95E-03                     | 1.26E-05 | 0.002941 |
|                 | eq                 |                              |          |          |
| <i>AC</i>       | kg                 | 2.36E-04                     | 1.03E-06 | 0.000235 |
|                 | SO <sub>2</sub> eq |                              |          |          |
| <i>ET</i>       | kg N               | 1.90E-04                     | 7.21E-07 | 0.000189 |
|                 | eq                 |                              |          |          |
| <i>HHC</i>      | CTUh               | 3.66E-09                     | 1.78E-11 | 3.64E-09 |
| <i>HHNC</i>     | CTUh               | 9.81E-09                     | 5.37E-11 | 9.76E-09 |
| <i>RE</i>       | kg                 | 1.79E-05                     |          |          |
|                 | PM2.5              |                              | 1.11E-07 | 1.78E-05 |
|                 | eq                 |                              |          |          |
| <i>EC</i>       | CTUe               | 4.72E-01                     | 0.002498 | 0.469411 |
| <i>FF</i>       | MJ                 | 1.40E-01                     | 0.000509 | 0.139232 |
|                 | surplus            |                              |          |          |

**Table S29** Environmental impacts of each substance in Freeze-drying process (Scale-2).

| Impact category | Unit               | Freeze-drying | Electricity (freeze-dryer) | Electricity (pump) |
|-----------------|--------------------|---------------|----------------------------|--------------------|
| <i>OD</i>       | kg                 | 5.51E-09      |                            |                    |
|                 | CFC                |               | 4.13E-09                   | 1.39E-09           |
|                 | -11 eq             |               |                            |                    |
| <i>GW</i>       | kg                 | 1.26E-01      | 0.094647                   | 0.031836           |
|                 | CO <sub>2</sub> eq |               |                            |                    |
| <i>SM</i>       | kg O <sub>3</sub>  | 7.00E-03      | 0.005235                   | 0.001761           |
|                 | eq                 |               |                            |                    |
| <i>AC</i>       | kg                 | 5.66E-04      | 0.000424                   | 0.000143           |
|                 | SO <sub>2</sub> eq |               |                            |                    |
| <i>ET</i>       | kg N               | 4.85E-04      | 0.000363                   | 0.000122           |
|                 | eq                 |               |                            |                    |
| <i>HHC</i>      | CTUh               | 8.27E-09      | 6.19E-09                   | 2.08E-09           |
| <i>HHNC</i>     | CTUh               | 2.97E-08      | 2.22E-08                   | 7.47E-09           |
| <i>RE</i>       | kg                 | 1.88E-04      |                            |                    |
|                 | PM2.5              |               | 0.000141                   | 4.74E-05           |
|                 | eq                 |               |                            |                    |
| <i>EC</i>       | CTUe               | 2.46E+00      | 1.841927                   | 0.619557           |
| <i>FF</i>       | MJ                 | 9.68E-02      | 0.072447                   | 0.024368           |
|                 | surplus            |               |                            |                    |

**Table S30.** Consumption for the synthesis of 1 g P<sub>triaz</sub>-CN-A in **Scale-1**. (Laboratory research, small dose feeding, supercritical CO<sub>2</sub> drying as drying method).

| Raw Materials                                             | Amount     | Units/<br>FU | Unit price<br>(CNY) | Cost<br>(CNY/g) | Brand                      |
|-----------------------------------------------------------|------------|--------------|---------------------|-----------------|----------------------------|
| <i>Synthesis of TriazoleBr</i>                            |            |              |                     |                 |                            |
| 1-vinyl-1,2,4-triazole                                    | 0.5124     | g            | 186.169             | 95.393          | Santa Cruz Biotechnology   |
| bromoacetonitrile                                         | 0.9698     | g            | 2.463               | 2.389           | Leyan                      |
| BHT                                                       | 4.6581E-03 | g            | 0.200               | 0.0009          | Adamas                     |
| Electricity (for IKA RCT basic)                           | 4.0246     | kWh          | 0.617               | 2.483           | /                          |
| <i>Synthesis of P<sub>triaz</sub>Br</i>                   |            |              |                     |                 |                            |
| AIBN                                                      | 0.01258    | g            | 0.53                | 0.007           | Collins                    |
| DMSO                                                      | 10.2478    | g            | 0.284               | 2.910           | Macklin                    |
| Electricity (for Edwards Pump)                            | 0.0210     | kWh          | 0.617               | 0.013           | /                          |
| Electricity (for IKA RCT basic)                           | 0.8944     | kWh          | 0.617               | 0.552           | /                          |
| <i>Synthesis of P<sub>triaz</sub>-CN</i>                  |            |              |                     |                 |                            |
| LiTFSI                                                    | 1.4114     | g            | 4.312               | 6.086           | Macklin                    |
| Water                                                     | 46.5810    | g            | 0.02                | 0.932           | /                          |
| Electricity (for Stirrer)                                 | 4.4718E-03 | kWh          | 0.617               | 0.003           | /                          |
| <i>TIPS Process</i>                                       |            |              |                     |                 |                            |
| EtOH                                                      | 2.2333     | g            | 0.006               | 0.013           | Sinopharm Chemical Reagent |
| DMF                                                       | 13.1167    | g            | 0.041               | 0.538           | Greagent                   |
| Electricity (for Experiment Oven)                         | 0.1975     | kWh          | 0.617               | 0.122           | /                          |
| <i>Crosslink &amp; Solvent Change Process</i>             |            |              |                     |                 |                            |
| NH <sub>3</sub>                                           | 1.9822     | g            | 0.081               | 0.161           | Wendong                    |
| EtOH                                                      | 394.4622   | g            | 0.006               | 2.367           | Sinopharm Chemical Reagent |
| <i>Drying Process-Supercritical CO<sub>2</sub> Drying</i> |            |              |                     |                 |                            |
| Electricity (for instrument)                              | 4.0000     | kWh          | 0.617               | 2.468           | /                          |
| CO <sub>2</sub>                                           | 275.0037   | g            | 0.002               | 0.55            | WenDong                    |
| <b>Total Cost (raw materials + electricity): 116.988</b>  |            |              |                     |                 |                            |

**Note:** The average price of electricity in Shanghai is 0.617 CNY/kWh.

**Table S31.** Consumption for the synthesis of 1 g PScale-2. (maximum production scale of the laboratory, freeze-drying as drying method).

| Raw Materials                                            | Amount     | Units/<br>FU | Unit price | Cost (CNY/g) | Brand                      |
|----------------------------------------------------------|------------|--------------|------------|--------------|----------------------------|
| <i>Synthesis of TriazoleBr</i>                           |            |              |            |              |                            |
| 1-vinyl-1,2,4-triazole                                   | 0.5059     | g            | 186.169    | 94.183       | Santa Cruz Biotechnology   |
| bromoacetonitrile                                        | 0.9562     | g            | 2.463      | 2.355        | Leyan                      |
| BHT                                                      | 4.6747E-03 | g            | 0.200      | 0.0009       | Adamas                     |
| Electricity (for IKA RCT basic)                          | 0.2186     | kWh          | 0.617      | 0.135        | /                          |
| <i>Synthesis of P<triazbr< i=""></triazbr<></i>          |            |              |            |              |                            |
| AIBN                                                     | 0.0124     | g            | 0.53       | 0.007        | Collins                    |
| DMSO                                                     | 12.0763    | g            | 0.284      | 3.430        | Macklin                    |
| Electricity (for Edwards Pump)                           | 1.1383E-03 | kWh          | 0.617      | 0.0007       | /                          |
| Electricity (for IKA RCT basic)                          | 0.04857    | kWh          | 0.617      | 0.030        | /                          |
| <i>Synthesis of P<triaz-cn< i=""></triaz-cn<></i>        |            |              |            |              |                            |
| LiTFSI                                                   | 1.4113     | g            | 4.312      | 6.086        | Macklin                    |
| Water                                                    | 11.4490    | g            | 0.02       | 0.229        | /                          |
| Electricity (for Stirrer)                                | 2.4284E-04 | kWh          | 0.617      | 0.0001       | /                          |
| <i>TIPS Process</i>                                      |            |              |            |              |                            |
| EtOH                                                     | 2.2363     | g            | 0.006      | 0.0134       | Sinopharm Chemical Reagent |
| DMF                                                      | 13.1235    | g            | 0.041      | 0.538        | Greagent                   |
| Electricity (for Experiment Oven)                        | 0.01073    | kWh          | 0.617      | 0.007        | /                          |
| <i>Crosslink &amp; Solvent Change Process</i>            |            |              |            |              |                            |
| NH <sub>3</sub>                                          | 0.1208     | g            | 0.081      | 0.01         | WenDong                    |
| EtOH                                                     | 23.9483    | g            | 0.006      | 0.144        | Sinopharm Chemical Reagent |
| <i>Drying Process-Freeze-Drying</i>                      |            |              |            |              |                            |
| Electricity (for freeze dryer)                           | 0.1336     | kWh          | 0.617      | 0.082        | /                          |
| Electricity (for pump)                                   | 0.04493    | kWh          | 0.617      | 0.028        | /                          |
| <b>Total Cost (raw materials + electricity): 107.280</b> |            |              |            |              |                            |

**Note:** The average price of electricity in Shanghai is 0.617 CNY/kWh.



**Table S32.** Preparation method and price of 1-vinylimidazole and 1-vinyl-1,2,4-triazole.

|                               | Reactions                                                                                                                                                   | Product                                                                                                                                      |
|-------------------------------|-------------------------------------------------------------------------------------------------------------------------------------------------------------|----------------------------------------------------------------------------------------------------------------------------------------------|
| <b>1-Vinylimidazole</b>       | 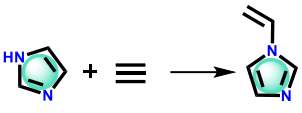 <p><b>Imidazole:</b> 160 CNY/kg<br/> <b>Acetylene:</b> 38 CNY/kg</p>      |  <p>640 CNY/kg</p>                                        |
| <b>1-Vinyl-1,2,4-Triazole</b> |  <p><b>1,2,4-Triazole:</b> 219 CNY/kg<br/> <b>Acetylene:</b> 38 CNY/kg</p> |  <p>186 CNY/g<br/> <b>(The cheapest price online)</b></p> |

## Supplementary References

1. Frisch, M. et al. Gaussian 09 (Revision D.01). (2009).
2. Zhang, J. & Lu, T. Efficient evaluation of electrostatic potential with computerized optimized code. *Phys. Chem. Chem. Phys.* **23**, 20323-20328 (2021).
3. Lu, T. & Chen, F. Multiwfn: a multifunctional wavefunction analyzer. *J. Comput. Chem.* **33**, 580-592 (2012).
4. Xiong, L. & Pei, Y. Symmetric growth of dual-packed kernel: exploration of the evolution of Au<sub>40</sub>(SR)<sub>24</sub> to Au<sub>49</sub>(SR)<sub>27</sub> and Au<sub>58</sub>(SR)<sub>30</sub> clusters via the 2e<sup>-</sup> reduction cluster growth mechanism. *ACS Omega* **6**, 18024-18032 (2021).
5. Pei, Y. et al. Interlocked catenane-like structure predicted in Au<sub>24</sub>(SR)<sub>20</sub>: implication to structural evolution of thiolated gold clusters from homoleptic gold(I) thiolates to core-stacked nanoparticles. *J. Am. Chem. Soc.* **134**, 3015-3024 (2012).
6. Zhang, L. et al. Covalent organic frameworks constructed by flexible alkyl amines for efficient gold recovery from leaching solution of e-waste. *Chem. Eng. J.* **426**, 131865 (2021).
7. Ma, T. et al. Efficient gold recovery from e-waste via a chelate-containing porous aromatic framework. *ACS Appl. Mater. Interfaces* **12**, 30474-30482 (2020).
8. Yang, S. et al. Covalent organic framework isomers for photoenhanced gold recovery from e-waste with high efficiency and selectivity. *ACS Sustainable Chem. Eng.* **10**, 9719-9731 (2022).
9. Liu, J., Deng, Z., Yu, H. & Wang, L. Ferrocene-based metal-organic framework for highly efficient recovery of gold from WEEE. *Chem. Eng. J.* **410**, 128360

- (2021).
10. Ma, T. et al. Turning electronic waste to continuous-flow reactor using porous aromatic frameworks. *ACS Appl. Mater. Interfaces* **14**, 25601-25608 (2022).
  11. Hong, Y. et al. Precious metal recovery from electronic waste by a porous porphyrin polymer. *Proc. Natl. Acad. Sci. U.S.A.* **117**, 16174-16180 (2020).
  12. Chen, X., Xiang, Y., Xu, L. & Liu, G. Recovery and reduction of Au(III) from mixed metal solution by thiourea-resorcinol-formaldehyde microspheres. *J. Hazard. Mater.* **397**, 122812 (2020).
  13. Nguyen, T. S., Hong, Y., Dogan, N. A. & Yavuz, C. T. Gold Recovery from E-Waste by Porous Porphyrin–Phenazine Network Polymers. *Chem. Mater.* **32**, 5343-5349 (2020).
  14. Qian, H. L., Meng, F. L., Yang, C. X. & Yan, X. P. Irreversible amide-linked covalent organic framework for selective and ultrafast gold recovery. *Angew. Chem. Int. Ed.* **59**, 17607-17613 (2020).
  15. Ding, R. et al. Highly efficient and selective gold recovery based on hypercross-linking and polyamine-functionalized porous organic polymers. *ACS Appl. Mater. Interfaces* **14**, 11803-11812 (2022).
  16. Chen, Y. et al. Construction of porphyrin and viologen-linked cationic porous organic polymer for efficient and selective gold recovery. *J. Hazard. Mater.* **426**, 128073 (2022).
  17. Guo, J. et al. Highly efficient and selective recovery of Au(III) from aqueous solution by bithiourea immobilized UiO-66-NH<sub>2</sub>: Performance and mechanisms. *Chem. Eng. J.* **425**, 130588 (2021).
